# Supplementary material for: Ubiquitin-proteasome system-mediated ubiquitination modification patterns and characterization of tumor microenvironment infiltration, stemness and cellular senescence in low-grade glioma
Source: publisher site journal article supplement (doi:10.18632/aging.204650), 2023-04-11
Supplement: Supplementary file [file aging-v15i8-204650-supplementary-material-SD3.pdf]

**Supplementary Table 2. Gene list of ubiquitination modifications mode signature genes and independent prognosis-related signature genes.**

| <b>Ubiquitination modifications mode signature genes</b> | <b>Independent prognosis-related signature genes</b> |
|----------------------------------------------------------|------------------------------------------------------|
| UBE2C                                                    | SFRP2                                                |
| CDC20                                                    | FSTL1                                                |
| AURKB                                                    | TACC3                                                |
| TACC3                                                    | CD248                                                |
| CDT1                                                     | CDT1                                                 |
| RTN1                                                     | UBE2C                                                |
| SERPINH1                                                 | NAPSB                                                |
| SCD                                                      |                                                      |
| TSPYL2                                                   |                                                      |
| MMP2                                                     |                                                      |
| SNAP91                                                   |                                                      |
| CD248                                                    |                                                      |
| FSTL1                                                    |                                                      |
| FRRS1L                                                   |                                                      |
| ACBD7                                                    |                                                      |
| JPH4                                                     |                                                      |
| KCNIP2                                                   |                                                      |
| NAPSB                                                    |                                                      |
| GALNT13                                                  |                                                      |
| APOL4                                                    |                                                      |
| HPCAL4                                                   |                                                      |
| COL6A2                                                   |                                                      |
| NRSN1                                                    |                                                      |
| INA                                                      |                                                      |
| FCGR3A                                                   |                                                      |
| ISG15                                                    |                                                      |
| VSTM2A                                                   |                                                      |
| VIM                                                      |                                                      |
| IFI6                                                     |                                                      |
| CSDC2                                                    |                                                      |
| GRIN1                                                    |                                                      |
| `HLA-DPA1`                                               |                                                      |
| SFRP2                                                    |                                                      |
| F5                                                       |                                                      |
| FAM163B                                                  |                                                      |
| USH1C                                                    |                                                      |
| SLC14A1                                                  |                                                      |

**Supplementary Table 3. Genes used to construct the score and their coefficients.**

| <b>Gene</b> | <b>Coef</b>        |
|-------------|--------------------|
| SFRP2       | -0.237798676450908 |
| FSTL1       | 0.511913277444825  |
| CD248       | -0.318666391623948 |
| CDT1        | -0.323570756788893 |
| UBE2C       | 0.394035278695233  |
| NAPSB       | 0.14550177126947   |
