# Supplementary material for: Ubiquitin-proteasome system-mediated ubiquitination modification patterns and characterization of tumor microenvironment infiltration, stemness and cellular senescence in low-grade glioma
Source: Aging (Albany NY). 2023 Apr 11;15(8):2970–98. doi: 10.18632/aging.204650 (PMC10188348; doi:10.18632/aging.204650)
Supplement: Supplementary Table 1 [file aging-15-204650-s002.xlsx]

## Sheet: Sheet1
Supplementary Table 1. The specific information about which UPS-cluster.
ID	UPS-cluster
TCGA-S9-A6WQ-01A	A
TCGA-S9-A7IS-01A	B
TCGA-DU-8162-01A	A
TCGA-HT-7858-01A	A
TCGA-DU-A5TU-01A	B
TCGA-S9-A6WO-01A	A
TCGA-TM-A84M-01A	B
TCGA-HW-A5KL-01A	A
TCGA-QH-A6CV-01A	B
TCGA-TM-A7CF-02A	A
TCGA-DB-A64P-01A	B
TCGA-HT-7485-01A	A
TCGA-HT-7687-01A	A
TCGA-DU-5870-01A	A
TCGA-E1-5302-01A	B
TCGA-TQ-A7RR-01A	A
TCGA-TM-A84T-01A	A
TCGA-FG-6688-01A	B
TCGA-TM-A84H-01A	A
TCGA-DU-7294-01A	A
TCGA-DH-A66D-01A	B
TCGA-DU-8161-01A	B
TCGA-DU-A6S7-01A	B
TCGA-DU-A7TA-01A	A
TCGA-DU-A6S8-01A	A
TCGA-FG-A710-01A	B
TCGA-CS-4941-01A	B
TCGA-QH-A6CZ-01A	A
TCGA-DU-7007-01A	A
TCGA-HT-7467-01A	B
TCGA-S9-A6TX-01A	B
TCGA-FG-A60L-01A	B
TCGA-DB-A64Q-01A	A
TCGA-HT-A4DV-01A	A
TCGA-KT-A7W1-01A	B
TCGA-TQ-A8XE-02A	B
TCGA-DH-A7UT-01A	A
TCGA-HT-8114-01A	B
TCGA-P5-A72U-01A	B
TCGA-HT-8105-01A	A
TCGA-FG-6691-01A	A
TCGA-DU-5870-02A	B
TCGA-HW-8322-01A	A
TCGA-DB-A75K-01A	B
TCGA-HT-7681-01A	A
TCGA-HT-7469-01A	B
TCGA-S9-A6WD-01A	A
TCGA-DU-8168-01A	A
TCGA-TM-A84J-01A	B
TCGA-TM-A84S-01A	A
TCGA-TQ-A7RF-01A	A
TCGA-DU-6392-01A	B
TCGA-E1-A7YW-01A	A
TCGA-DU-A7TD-01A	B
TCGA-HT-7474-01A	A
TCGA-DU-5855-01A	A
TCGA-S9-A7QW-01A	B
TCGA-HT-A619-01A	A
TCGA-HT-7692-01A	B
TCGA-DU-6405-01A	B
TCGA-E1-A7YQ-01A	B
TCGA-WY-A85A-01A	A
TCGA-DU-5872-02A	B
TCGA-DB-A64S-01A	B
TCGA-CS-4943-01A	B
TCGA-E1-A7YO-01A	A
TCGA-TQ-A7RW-01A	B
TCGA-DB-A4XA-01A	A
TCGA-DH-A669-01A	B
TCGA-FG-8182-01A	A
TCGA-DB-A64R-01A	A
TCGA-RY-A847-01A	A
TCGA-HT-7476-01A	B
TCGA-DU-A7T8-01A	B
TCGA-DU-6394-01A	A
TCGA-TM-A84F-01A	B
TCGA-HW-7493-01A	A
TCGA-DU-7009-01A	A
TCGA-DU-5849-01A	A
TCGA-DU-5871-01A	A
TCGA-RY-A845-01A	A
TCGA-HT-7676-01A	B
TCGA-S9-A6WH-01A	A
TCGA-DU-6407-02A	B
TCGA-HT-8104-01A	B
TCGA-HT-A618-01A	A
TCGA-WY-A858-01A	B
TCGA-DU-7010-01A	B
TCGA-VM-A8CE-01A	A
TCGA-R8-A73M-01A	A
TCGA-E1-A7Z4-01A	A
TCGA-HT-7874-01A	A
TCGA-DH-A7UU-01A	B
TCGA-S9-A7IY-01A	A
TCGA-E1-A7YD-01A	B
TCGA-S9-A7IQ-01A	A
TCGA-FG-A4MY-01A	A
TCGA-HT-7605-01A	A
TCGA-DU-6406-01A	B
TCGA-DU-6403-01A	B
TCGA-HT-7473-01A	A
TCGA-TQ-A7RG-01A	A
TCGA-P5-A72X-01A	A
TCGA-TM-A7CF-01A	A
TCGA-E1-5307-01A	A
TCGA-WH-A86K-01A	B
TCGA-E1-A7YM-01A	B
TCGA-HW-8319-01A	A
TCGA-HW-7495-01A	A
TCGA-DU-A6S2-01A	A
TCGA-P5-A5EV-01A	A
TCGA-CS-5397-01A	B
TCGA-RY-A840-01A	B
TCGA-CS-6669-01A	A
TCGA-HT-7694-01A	A
TCGA-DU-8167-01A	B
TCGA-FG-8186-01A	A
TCGA-DB-5270-01A	A
TCGA-FG-A70Y-01A	A
TCGA-HW-7487-01A	A
TCGA-HT-7616-01A	A
TCGA-QH-A65R-01A	A
TCGA-HT-7686-01A	A
TCGA-HT-8012-01A	A
TCGA-DU-6400-01A	A
TCGA-DH-5141-01A	A
TCGA-HT-7873-01B	A
TCGA-HT-7608-01A	A
TCGA-FG-8188-01A	A
TCGA-HT-7606-01A	B
TCGA-DU-6397-02A	B
TCGA-P5-A5F4-01A	A
TCGA-DU-7292-01A	B
TCGA-QH-A6X8-01A	A
TCGA-S9-A6WG-01A	B
TCGA-E1-A7YE-01A	B
TCGA-S9-A6U5-01A	A
TCGA-W9-A837-01A	A
TCGA-F6-A8O4-01A	A
TCGA-FG-A60J-01A	A
TCGA-HT-7471-01A	B
TCGA-CS-5396-01A	A
TCGA-FG-A713-01A	A
TCGA-DH-A669-02A	B
TCGA-WY-A85B-01A	B
TCGA-HT-7691-01A	A
TCGA-DU-6410-01A	A
TCGA-TQ-A7RV-01A	A
TCGA-HT-7604-01A	B
TCGA-HW-A5KJ-01A	B
TCGA-S9-A7QX-01A	B
TCGA-DU-8158-01A	B
TCGA-HT-7688-01A	A
TCGA-TM-A7C3-01A	B
TCGA-HT-7472-01A	A
TCGA-S9-A7R2-01A	A
TCGA-VM-A8C8-01A	A
TCGA-QH-A6CY-01A	A
TCGA-E1-A7YJ-01A	B
TCGA-HT-8558-01A	A
TCGA-R8-A6MO-01A	A
TCGA-CS-5394-01A	A
TCGA-P5-A780-01A	A
TCGA-R8-A6MK-01A	A
TCGA-HT-A5R5-01A	A
TCGA-HT-A74L-01A	A
TCGA-FN-7833-01A	B
TCGA-DB-A64W-01A	B
TCGA-DU-7018-01A	B
TCGA-FG-8181-01A	A
TCGA-QH-A6CS-01A	A
TCGA-VM-A8CH-01A	A
TCGA-TQ-A8XE-01A	A
TCGA-FG-5965-02B	A
TCGA-DU-6404-02B	B
TCGA-DB-A4XB-01A	B
TCGA-HT-7620-01A	A
TCGA-TM-A7C5-01A	A
TCGA-HT-A615-01A	A
TCGA-DB-5274-01A	B
TCGA-WY-A85E-01A	A
TCGA-FG-A87N-01A	B
TCGA-TM-A84G-01A	A
TCGA-DU-6397-01A	A
TCGA-DH-A7UV-01A	A
TCGA-HT-7857-01A	B
TCGA-S9-A6TU-01A	A
TCGA-FG-A6IZ-01A	B
TCGA-E1-5303-01A	B
TCGA-DU-7302-01A	A
TCGA-HW-7491-01A	A
TCGA-RY-A83X-01A	A
TCGA-FG-5965-01B	B
TCGA-FG-5962-01B	A
TCGA-DU-A5TY-01A	B
TCGA-HW-7486-01A	A
TCGA-HT-7693-01A	A
TCGA-DB-A75M-01A	A
TCGA-DU-7301-01A	B
TCGA-KT-A74X-01A	A
TCGA-P5-A5EZ-01A	B
TCGA-VM-A8CB-01A	A
TCGA-CS-5393-01A	A
TCGA-DB-A4XF-01A	B
TCGA-HT-A61B-01A	B
TCGA-DB-A64O-01A	A
TCGA-S9-A6WI-01A	A
TCGA-S9-A7QZ-01A	A
TCGA-VM-A8CD-01A	B
TCGA-HT-7610-01A	A
TCGA-CS-6290-01A	A
TCGA-P5-A5F1-01A	A
TCGA-DU-7011-01A	A
TCGA-DU-A7T6-01A	B
TCGA-TM-A7CA-01A	A
TCGA-HT-A5R7-01A	A
TCGA-DU-6395-01A	A
TCGA-HT-A74O-01A	B
TCGA-FG-7637-01A	A
TCGA-CS-5395-01A	B
TCGA-DU-7008-01A	B
TCGA-TQ-A7RV-02A	A
TCGA-DU-5847-01A	B
TCGA-S9-A7R4-01A	A
TCGA-CS-4942-01A	B
TCGA-HT-7677-01A	A
TCGA-E1-5304-01A	B
TCGA-TQ-A7RN-01A	A
TCGA-S9-A6WL-01A	A
TCGA-QH-A6CW-01A	B
TCGA-FG-A87Q-01A	B
TCGA-WY-A85C-01A	A
TCGA-QH-A6X3-01A	A
TCGA-S9-A6TV-01A	B
TCGA-TM-A84C-01A	A
TCGA-S9-A6WN-01A	A
TCGA-FG-A4MX-01A	B
TCGA-DB-A64U-01A	A
TCGA-DU-7014-01A	A
TCGA-HT-7690-01A	B
TCGA-QH-A6X5-01A	A
TCGA-QH-A86X-01A	A
TCGA-FG-A4MT-01A	B
TCGA-DU-7015-01A	B
TCGA-TQ-A7RH-01A	A
TCGA-HT-A61A-01A	A
TCGA-E1-5318-01A	A
TCGA-HT-7602-01A	A
TCGA-FG-A6J3-01A	B
TCGA-HW-7489-01A	A
TCGA-HT-8018-01A	A
TCGA-DB-5281-01A	B
TCGA-DB-A64L-01A	A
TCGA-S9-A6WP-01A	B
TCGA-E1-A7YU-01A	A
TCGA-DU-A5TW-01A	A
TCGA-S9-A6U8-01A	A
TCGA-DU-8164-01A	A
TCGA-DU-8165-01A	B
TCGA-P5-A5F6-01A	B
TCGA-HT-7875-01A	A
TCGA-E1-A7Z6-01A	A
TCGA-HT-7882-01A	B
TCGA-S9-A89Z-01A	B
TCGA-DU-7300-01A	A
TCGA-S9-A7J1-01A	A
TCGA-S9-A7R8-01A	B
TCGA-DB-A4XE-01A	B
TCGA-FG-A6J1-01A	B
TCGA-DB-A64V-01A	A
TCGA-DU-A6S3-01A	A
TCGA-DU-A7TB-01A	A
TCGA-DU-6408-01A	B
TCGA-TQ-A7RK-01A	B
TCGA-S9-A7J3-01A	A
TCGA-S9-A6TZ-01A	A
TCGA-HT-7689-01A	A
TCGA-HT-A74H-01A	A
TCGA-S9-A6U1-01A	B
TCGA-TQ-A7RQ-01A	A
TCGA-E1-5305-01A	B
TCGA-VM-A8C9-01A	A
TCGA-RY-A83Y-01A	A
TCGA-FG-8187-01A	A
TCGA-DB-A64X-01A	A
TCGA-DB-A4XD-01A	A
TCGA-HT-7611-01A	A
TCGA-TM-A84L-01A	A
TCGA-S9-A7R7-01A	A
TCGA-DU-6401-01A	A
TCGA-QH-A6X9-01A	A
TCGA-DB-A4XC-01A	B
TCGA-F6-A8O3-01A	A
TCGA-DB-5278-01A	A
TCGA-HT-8563-01A	B
TCGA-FG-8185-01A	A
TCGA-E1-A7YH-01A	A
TCGA-HW-A5KM-01A	A
TCGA-E1-A7YV-01A	B
TCGA-HT-A4DS-01A	B
TCGA-HT-7483-01A	B
TCGA-HT-7884-01B	A
TCGA-CS-6667-01A	A
TCGA-DH-5143-01A	A
TCGA-DB-A75O-01A	A
TCGA-DU-5854-01A	B
TCGA-P5-A72Z-01A	B
TCGA-HW-A5KK-01A	B
TCGA-TQ-A7RI-01A	A
TCGA-QH-A870-01A	A
TCGA-RY-A843-01A	B
TCGA-HT-7475-01A	A
TCGA-DU-A7TJ-01A	B
TCGA-HW-7490-01A	A
TCGA-E1-5311-01A	A
TCGA-DU-7299-01A	A
TCGA-E1-A7YS-01A	A
TCGA-S9-A7J2-01A	A
TCGA-E1-A7YI-01A	B
TCGA-DU-A76K-01A	B
TCGA-HT-8019-01A	A
TCGA-HT-7468-01A	A
TCGA-DH-5140-01A	B
TCGA-VW-A7QS-01A	A
TCGA-S9-A6U9-01A	A
TCGA-FG-7634-01A	B
TCGA-P5-A77X-01A	A
TCGA-HT-8010-01A	A
TCGA-S9-A6U2-01A	A
TCGA-HT-8113-01A	A
TCGA-S9-A6TS-01A	A
TCGA-S9-A7R3-01A	A
TCGA-E1-A7Z2-01A	B
TCGA-DU-7309-01A	A
TCGA-HW-8320-01A	A
TCGA-CS-6668-01A	A
TCGA-S9-A6U6-01A	A
TCGA-FG-5965-02A	B
TCGA-DU-6393-01A	B
TCGA-HT-A74J-01A	A
TCGA-E1-A7YL-01A	B
TCGA-QH-A6XC-01A	B
TCGA-HT-7609-01A	A
TCGA-QH-A65X-01A	B
TCGA-P5-A731-01A	B
TCGA-HT-7695-01A	A
TCGA-FG-A4MW-01A	B
TCGA-E1-A7Z3-01A	A
TCGA-P5-A5F0-01A	A
TCGA-DH-A66F-01A	A
TCGA-HT-8110-01A	B
TCGA-VW-A8FI-01A	B
TCGA-S9-A7R1-01A	A
TCGA-DU-7019-01A	A
TCGA-QH-A65V-01A	A
TCGA-DB-5280-01A	A
TCGA-FG-A60K-01A	A
TCGA-HT-7479-01A	A
TCGA-P5-A737-01A	A
TCGA-IK-7675-01A	B
TCGA-S9-A6WE-01A	A
TCGA-QH-A6CU-01A	A
TCGA-P5-A781-01A	A
TCGA-FG-A711-01A	A
TCGA-HT-8108-01A	B
TCGA-DU-A7TG-01A	A
TCGA-FG-A4MU-01B	B
TCGA-TM-A84Q-01A	A
TCGA-DU-6407-01A	B
TCGA-DU-7013-01A	B
TCGA-HT-8109-01A	A
TCGA-DU-6407-02B	B
TCGA-E1-A7YY-01A	A
TCGA-DU-A6S6-01A	A
TCGA-HT-8013-01A	B
TCGA-CS-6670-01A	A
TCGA-E1-5319-01A	A
TCGA-TQ-A7RK-02B	B
TCGA-TQ-A7RM-01A	B
TCGA-HT-7680-01A	A
TCGA-HT-7902-01A	B
TCGA-TQ-A7RO-01A	A
TCGA-DU-A7TI-01A	B
TCGA-HT-7607-01A	A
TCGA-P5-A5EW-01A	A
TCGA-CS-4944-01A	A
TCGA-TM-A7C4-01A	A
TCGA-DU-A5TS-01A	B
TCGA-QH-A6X4-01A	A
TCGA-P5-A5F2-01A	A
TCGA-DU-7006-01A	B
TCGA-HT-A617-01A	A
TCGA-P5-A72W-01A	A
TCGA-FG-7643-01A	A
TCGA-DU-5874-01A	A
TCGA-S9-A7QY-01A	A
TCGA-DB-A4XH-01A	A
TCGA-VV-A86M-01A	A
TCGA-HW-8321-01A	A
TCGA-DB-A75L-01A	B
TCGA-HT-8564-01A	B
TCGA-DU-6404-02A	A
TCGA-DU-A5TP-01A	A
TCGA-CS-6666-01A	B
TCGA-DU-7012-01A	B
TCGA-HT-A5R9-01A	A
TCGA-E1-A7YK-01A	B
TCGA-HT-7856-01A	A
TCGA-VM-A8CF-01A	A
TCGA-HT-8111-01A	B
TCGA-HT-7881-01A	A
TCGA-DU-7304-01A	A
TCGA-DU-5853-01A	A
TCGA-CS-4938-01B	A
TCGA-VM-A8CA-01A	A
TCGA-S9-A6U0-01A	B
TCGA-DU-6402-01A	B
TCGA-DH-A7US-01A	A
TCGA-TM-A84R-01A	A
TCGA-HT-7860-01A	A
TCGA-P5-A730-01A	B
TCGA-DU-A5TT-01A	B
TCGA-R8-A6ML-01A	A
TCGA-P5-A735-01A	A
TCGA-DU-6404-01A	B
TCGA-HT-7854-01A	A
TCGA-TM-A84I-01A	B
TCGA-HT-7481-01A	A
TCGA-P5-A733-01A	A
TCGA-DU-A7TC-01A	B
TCGA-DU-8166-01A	A
TCGA-E1-5322-01A	B
TCGA-DU-A76R-01A	A
TCGA-DB-5277-01A	B
TCGA-HT-7877-01A	A
TCGA-HT-7684-01A	A
TCGA-S9-A6UB-01A	A
TCGA-S9-A6TY-01A	A
TCGA-HT-8107-01A	A
TCGA-HT-7470-01A	A
TCGA-HT-7601-01A	B
TCGA-FG-5964-01A	A
TCGA-DU-A76O-01A	B
TCGA-P5-A5EY-01A	A
TCGA-DU-7298-01A	B
TCGA-WY-A85D-01A	A
TCGA-EZ-7264-01A	A
TCGA-DB-A75P-01A	A
TCGA-QH-A65Z-01A	A
TCGA-QH-A6XA-01A	A
TCGA-DH-A66B-01A	B
TCGA-S9-A7IX-01A	B
TCGA-DB-5279-01A	A
TCGA-HT-A5RB-01A	A
TCGA-FG-7641-01B	A
TCGA-DB-A4X9-01A	A
TCGA-FG-7638-01B	A
TCGA-DU-6399-01A	B
TCGA-DU-8163-01A	B
TCGA-P5-A77W-01A	A
TCGA-S9-A6WM-01A	B
TCGA-DU-A76L-01A	B
TCGA-HT-A614-01A	A
TCGA-CS-6186-01A	B
TCGA-QH-A65S-01A	A
TCGA-HT-7478-01A	B
TCGA-HT-A61C-01A	B
TCGA-HT-A5RA-01A	B
TCGA-TQ-A7RK-02A	B
TCGA-DU-7290-01A	B
TCGA-WY-A859-01A	A
TCGA-HT-7482-01A	A
TCGA-HT-8015-01B	A
TCGA-P5-A736-01A	A
TCGA-DB-5275-01A	B
TCGA-P5-A5EX-01A	A
TCGA-S9-A7IZ-01A	A
TCGA-DU-7306-01A	A
TCGA-RY-A83Z-01A	B
TCGA-DB-A4XG-01A	A
TCGA-S9-A89V-01A	A
TCGA-TM-A84O-01A	A
TCGA-TM-A84B-01A	B
TCGA-DU-7304-02A	B
TCGA-DU-6396-01A	A
TCGA-DU-5852-01A	B
TCGA-FG-A4MT-02A	A
TCGA-HT-8011-01A	B
TCGA-DH-5144-01A	A
TCGA-HT-7855-01A	A
TCGA-FG-6690-01A	A
TCGA-HT-7879-01A	A
TCGA-FG-8191-01A	A
TCGA-HT-7603-01A	A
TCGA-DH-5142-01A	B
TCGA-QH-A6CX-01A	A
TCGA-FG-8189-01B	A
TCGA-E1-A7YN-01A	B
TCGA-CS-6188-01A	B
TCGA-HT-A74K-01A	B
TCGA-FG-7636-01A	A
TCGA-DU-5872-01A	A
TCGA-HT-7480-01A	A
TCGA-FG-A70Z-01A	B
TCGA-IK-8125-01A	A
TCGA-FG-5963-01A	B
TCGA-TQ-A7RP-01A	A
TCGA-HT-7880-01A	A
TCGA-DH-A7UR-01A	B
TCGA-S9-A6UA-01A	B
TCGA-S9-A6TW-01A	A
TCGA-HT-A5RC-01A	B
TCGA-HT-A616-01A	A
TCGA-DU-A5TR-01A	A
TCGA-FG-5963-02A	B
TCGA-HT-7477-01B	B
TCGA-FG-6689-01A	A
TCGA-DB-5273-01A	B
TCGA-VV-A829-01A	A
TCGA-DH-A66G-01A	A
TCGA-FG-6692-01A	B
TCGA-TQ-A7RJ-01A	A
TCGA-S9-A7J0-01A	B
CGGA_1002	A
CGGA_103	A
CGGA_1055	A
CGGA_107	A
CGGA_108	A
CGGA_1108	A
CGGA_1111	A
CGGA_1120	B
CGGA_1121	A
CGGA_1126	A
CGGA_1131	A
CGGA_1132	B
CGGA_1137	B
CGGA_1141	B
CGGA_1144	B
CGGA_1154	A
CGGA_1155	B
CGGA_1161	B
CGGA_1162	B
CGGA_1169	A
CGGA_1178	A
CGGA_1183	A
CGGA_1184	B
CGGA_1185	A
CGGA_1191	A
CGGA_1195	B
CGGA_1205	B
CGGA_1207	B
CGGA_1212	A
CGGA_1223	A
CGGA_1232	A
CGGA_1235	B
CGGA_1264	A
CGGA_1269	A
CGGA_1273	A
CGGA_1291	B
CGGA_1295	A
CGGA_1300	A
CGGA_1303	B
CGGA_1305	A
CGGA_1309	B
CGGA_1311	A
CGGA_1319	B
CGGA_1321	A
CGGA_135	A
CGGA_1356	A
CGGA_1359	A
CGGA_1362	A
CGGA_1369	B
CGGA_1377	A
CGGA_1383	B
CGGA_1386	B
CGGA_1389	B
CGGA_1390	B
CGGA_1398	A
CGGA_1400	B
CGGA_1401	A
CGGA_1404	A
CGGA_1407	B
CGGA_1413	A
CGGA_1416	B
CGGA_1417	A
CGGA_1421	B
CGGA_1424	B
CGGA_1431	B
CGGA_1434	A
CGGA_1435	A
CGGA_1437	B
CGGA_1445	B
CGGA_1447	B
CGGA_1458	A
CGGA_1459	A
CGGA_1469	B
CGGA_1473	A
CGGA_1474	B
CGGA_1482	B
CGGA_1487	A
CGGA_1497	A
CGGA_1504	B
CGGA_1508	B
CGGA_1510	A
CGGA_1513	B
CGGA_1518	A
CGGA_1524	A
CGGA_1525	B
CGGA_1526	A
CGGA_1527	A
CGGA_1530	B
CGGA_1531	A
CGGA_1533	B
CGGA_1544	A
CGGA_1552	A
CGGA_1553	A
CGGA_1554	A
CGGA_1557	B
CGGA_1562	B
CGGA_1565	B
CGGA_1566	A
CGGA_1567	B
CGGA_1568	B
CGGA_1569	B
CGGA_1575	A
CGGA_1580	A
CGGA_1587	A
CGGA_1588	B
CGGA_1591	A
CGGA_1592	A
CGGA_1598	A
CGGA_1606	A
CGGA_1608	A
CGGA_1610	B
CGGA_1614	B
CGGA_1618	B
CGGA_1619	A
CGGA_1620	B
CGGA_1623	B
CGGA_1627	B
CGGA_1640	B
CGGA_1645	A
CGGA_1648	B
CGGA_1657	B
CGGA_1661	B
CGGA_1667	A
CGGA_1669	A
CGGA_1670	A
CGGA_1671	A
CGGA_1672	B
CGGA_1675	A
CGGA_1679	B
CGGA_1680	A
CGGA_1685	A
CGGA_1686	B
CGGA_1688	A
CGGA_1693	A
CGGA_1695	B
CGGA_1696	B
CGGA_1700	B
CGGA_1701	B
CGGA_1714	B
CGGA_1716	A
CGGA_1718	A
CGGA_1721	B
CGGA_1723	B
CGGA_1725	A
CGGA_1731	B
CGGA_1737	B
CGGA_1738	A
CGGA_1739	A
CGGA_1743	B
CGGA_1745	B
CGGA_1747	B
CGGA_1771	A
CGGA_1786	A
CGGA_1791	B
CGGA_1809	A
CGGA_1854	B
CGGA_1862	A
CGGA_1863	A
CGGA_1877	A
CGGA_1880	A
CGGA_1882	B
CGGA_1903	B
CGGA_1906	B
CGGA_194	A
CGGA_1994	B
CGGA_2006	A
CGGA_2046	A
CGGA_2079	A
CGGA_2081	A
CGGA_2129	A
CGGA_279	A
CGGA_336	A
CGGA_358	B
CGGA_406	A
CGGA_420	A
CGGA_457	A
CGGA_474	A
CGGA_492	A
CGGA_507	B
CGGA_521	A
CGGA_554	B
CGGA_621	A
CGGA_625	A
CGGA_634	A
CGGA_652	A
CGGA_703	A
CGGA_705	A
CGGA_763	A
CGGA_780	A
CGGA_799	A
CGGA_810	A
CGGA_825	A
CGGA_852	A
CGGA_861	A
CGGA_867	A
CGGA_881	A
CGGA_882	A
CGGA_887	B
CGGA_888	A
CGGA_890	A
CGGA_901	A
CGGA_903	A
CGGA_D28	A
CGGA_J73	A
CGGA_P104	B
CGGA_P108	A
CGGA_P110	A
CGGA_P131	A
CGGA_P142	A
CGGA_P144	A
CGGA_P157	A
CGGA_P159	A
CGGA_P163	A
CGGA_P165	B
CGGA_P17	A
CGGA_P172	B
CGGA_P18	A
CGGA_P181	A
CGGA_P183	A
CGGA_P185	A
CGGA_P23	B
CGGA_P265	B
CGGA_P266	B
CGGA_P269	A
CGGA_P279	B
CGGA_P29	B
CGGA_P298	A
CGGA_P3	B
CGGA_P308	B
CGGA_P310	B
CGGA_P314	B
CGGA_P319	A
CGGA_P326	B
CGGA_P328	A
CGGA_P337	A
CGGA_P364	A
CGGA_P388	A
CGGA_P416	A
CGGA_P421	A
CGGA_P437	A
CGGA_P438	A
CGGA_P446	A
CGGA_P461	A
CGGA_P468	A
CGGA_P483	A
CGGA_P5	A
CGGA_P508	A
CGGA_P510	A
CGGA_P520	A
CGGA_P568	A
CGGA_P594	A
CGGA_P604	A
CGGA_P623	A
CGGA_P633	A
CGGA_P98	B
CGGA_1006	A
CGGA_1034	A
CGGA_1079	B
CGGA_1081	A
CGGA_1140	B
CGGA_1145	A
CGGA_1263	B
CGGA_1280	A
CGGA_1281	B
CGGA_1284	A
CGGA_1292	B
CGGA_1340	A
CGGA_1408	A
CGGA_1411	B
CGGA_330	A
CGGA_426	A
CGGA_448	A
CGGA_488	A
CGGA_564	A
CGGA_565	B
CGGA_578	A
CGGA_599	B
CGGA_616	A
CGGA_630	A
CGGA_643	A
CGGA_661	A
CGGA_678	A
CGGA_727	A
CGGA_732	A
CGGA_791	A
CGGA_D06	B
CGGA_D11	A
CGGA_D16	A
CGGA_D18	A
CGGA_D44	A
CGGA_D58	B
CGGA_1027	A
CGGA_1061	A
CGGA_1094	A
CGGA_1113	A
CGGA_1146	A
CGGA_1160	A
CGGA_1189	A
CGGA_1190	A
CGGA_1215	A
CGGA_1231	B
CGGA_1307	A
CGGA_1322	A
CGGA_1329	A
CGGA_1374	A
CGGA_1388	A
CGGA_245	A
CGGA_314	A
CGGA_337	A
CGGA_400	B
CGGA_431	A
CGGA_490	B
CGGA_510	A
CGGA_560	A
CGGA_591	A
CGGA_598	A
CGGA_603	A
CGGA_605	A
CGGA_641	A
CGGA_D14	A
CGGA_D21	A
CGGA_D24	A
CGGA_D27	A
CGGA_D33	A
CGGA_D45	A
CGGA_D46	A
CGGA_D48	A
CGGA_D52	B
CGGA_D56	A
CGGA_277	B
CGGA_J023	A
CGGA_1118	A
CGGA_1246	A
CGGA_247	A
CGGA_1003	A
CGGA_1010	B
CGGA_1012	A
CGGA_1014	A
CGGA_1018	A
CGGA_1030	A
CGGA_1032	B
CGGA_1033	B
CGGA_1037	B
CGGA_1048	A
CGGA_1051	B
CGGA_1057	B
CGGA_1058	A
CGGA_106	B
CGGA_1063	B
CGGA_1065	A
CGGA_1066	A
CGGA_1069	A
CGGA_1082	B
CGGA_1087	A
CGGA_1097	A
CGGA_1100	B
CGGA_1101	B
CGGA_112	A
CGGA_1127	B
CGGA_1147	A
CGGA_1148	A
CGGA_1152	B
CGGA_1156	B
CGGA_1157	B
CGGA_1158	A
CGGA_1159	B
CGGA_1181	A
CGGA_1192	A
CGGA_1198	B
CGGA_1204	A
CGGA_1211	A
CGGA_1226	A
CGGA_1228	B
CGGA_1238	A
CGGA_1239	A
CGGA_1286	B
CGGA_1317	B
CGGA_1318	A
CGGA_1334	A
CGGA_1335	A
CGGA_1339	A
CGGA_1345	B
CGGA_1350	B
CGGA_1361	A
CGGA_1368	B
CGGA_1427	B
CGGA_1440	A
CGGA_1443	A
CGGA_1446	B
CGGA_1454	B
CGGA_1455	B
CGGA_1463	A
CGGA_1471	A
CGGA_1477	B
CGGA_1488	A
CGGA_1502	B
CGGA_1514	B
CGGA_1516	A
CGGA_1517	A
CGGA_1523	A
CGGA_1528	B
CGGA_1536	A
CGGA_1563	A
CGGA_157	B
CGGA_1579	B
CGGA_1583	B
CGGA_1589	A
CGGA_1594	B
CGGA_1607	A
CGGA_1617	B
CGGA_1621	A
CGGA_1630	B
CGGA_1642	B
CGGA_1647	B
CGGA_1649	B
CGGA_165	B
CGGA_1651	B
CGGA_1653	B
CGGA_1655	B
CGGA_1660	B
CGGA_1662	B
CGGA_1664	B
CGGA_1673	A
CGGA_1677	B
CGGA_1689	A
CGGA_1703	B
CGGA_1704	B
CGGA_1715	A
CGGA_1720	A
CGGA_1760	A
CGGA_1829	B
CGGA_1850	A
CGGA_1875	A
CGGA_1902	A
CGGA_1939	B
CGGA_2002	A
CGGA_2013	B
CGGA_2121	A
CGGA_265	A
CGGA_28	B
CGGA_288	A
CGGA_290	A
CGGA_320	A
CGGA_362	A
CGGA_369	B
CGGA_42	A
CGGA_482	A
CGGA_503	A
CGGA_583	B
CGGA_619	A
CGGA_663	A
CGGA_707	A
CGGA_720	A
CGGA_721	A
CGGA_724	B
CGGA_730	A
CGGA_809	A
CGGA_846	B
CGGA_862	B
CGGA_863	A
CGGA_883	A
CGGA_889	A
CGGA_D19	A
CGGA_D50	A
CGGA_J50	A
CGGA_P103	A
CGGA_P107	A
CGGA_P11	B
CGGA_P111	A
CGGA_P113	A
CGGA_P114	A
CGGA_P115	B
CGGA_P121	B
CGGA_P122	A
CGGA_P128	A
CGGA_P13	A
CGGA_P132	A
CGGA_P137	A
CGGA_P145	B
CGGA_P146	A
CGGA_P147	A
CGGA_P150	A
CGGA_P151	B
CGGA_P153	B
CGGA_P155	A
CGGA_P156	A
CGGA_P158	B
CGGA_P173	A
CGGA_P174	A
CGGA_P176	A
CGGA_P177	A
CGGA_P179	A
CGGA_P19	A
CGGA_P20	A
CGGA_P21	A
CGGA_P27	A
CGGA_P270	A
CGGA_P271	B
CGGA_P286	A
CGGA_P30	A
CGGA_P306	A
CGGA_P31	B
CGGA_P311	A
CGGA_P315	B
CGGA_P316	B
CGGA_P338	A
CGGA_P346	A
CGGA_P356	B
CGGA_P358	B
CGGA_P392	A
CGGA_P399	A
CGGA_P422	A
CGGA_P439	A
CGGA_P492	A
CGGA_P500	A
CGGA_P501	A
CGGA_P505	A
CGGA_P615	A
CGGA_P83	A
CGGA_P84	A
CGGA_P86	A
CGGA_P93	A
CGGA_1022	B
CGGA_1052	B
CGGA_235	A
CGGA_269	B
CGGA_276	A
CGGA_323	B
CGGA_493	A
CGGA_541	B
CGGA_633	A
CGGA_638	A
CGGA_659	B
CGGA_766	A
CGGA_796	B
CGGA_807	B
CGGA_871	A
CGGA_J030	A
CGGA_J130	B
CGGA_1005	A
CGGA_1013	B
CGGA_1020	A
CGGA_1031	A
CGGA_1046	B
CGGA_1050	A
CGGA_1330	A
CGGA_1406	A
CGGA_171	B
CGGA_236	A
CGGA_241	B
CGGA_251	B
CGGA_252	A
CGGA_254	B
CGGA_256	A
CGGA_261	B
CGGA_267	B
CGGA_273	A
CGGA_283	B
CGGA_300	B
CGGA_333	A
CGGA_446	B
CGGA_458	A
CGGA_479	B
CGGA_485	A
CGGA_501	A
CGGA_502	A
CGGA_538	A
CGGA_543	B
CGGA_551	A
CGGA_580	A
CGGA_601	B
CGGA_607	A
CGGA_632	A
CGGA_635	A
CGGA_642	A
CGGA_655	A
CGGA_662	A
CGGA_666	A
CGGA_671	B
CGGA_675	A
CGGA_685	A
CGGA_689	A
CGGA_694	B
CGGA_698	A
CGGA_704	A
CGGA_715	B
CGGA_725	B
CGGA_752	A
CGGA_757	A
CGGA_760	B
CGGA_762	B
CGGA_785	B
CGGA_812	B
CGGA_815	A
CGGA_818	A
CGGA_834	A
CGGA_835	B
CGGA_838	A
CGGA_843	A
CGGA_856	B
CGGA_858	B
CGGA_864	B
CGGA_884	A
CGGA_892	A
CGGA_893	A
CGGA_898	B
CGGA_904	A
CGGA_905	A
CGGA_908	A
CGGA_909	A
CGGA_D04	A
CGGA_D07	B
CGGA_D15	A
CGGA_D20	B
CGGA_D29	B
CGGA_D39	A
CGGA_D40	A
CGGA_D47	A
CGGA_J024	B
CGGA_J042	A
CGGA_1004	B
CGGA_1059	A
CGGA_1071	A
CGGA_243	A
CGGA_738	A
