# Supplementary material for: Ubiquitin-proteasome system-mediated ubiquitination modification patterns and characterization of tumor microenvironment infiltration, stemness and cellular senescence in low-grade glioma
Source: Aging (Albany NY). 2023 Apr 11;15(8):2970–98. doi: 10.18632/aging.204650 (PMC10188348; doi:10.18632/aging.204650)
Supplement: Supplementary Table 4 [file aging-15-204650-s004.xlsx]

## Sheet: Sheet1
Supplementary Table 4. UM-score for each sample.
id	UM-score
TCGA-S9-A6WQ-01A	-0.235933
TCGA-S9-A7IS-01A	1.75781
TCGA-DU-8162-01A	1.44234
TCGA-HT-7858-01A	0.444224
TCGA-DU-A5TU-01A	1.56345
TCGA-S9-A6WO-01A	-0.319291
TCGA-TM-A84M-01A	0.987097
TCGA-HW-A5KL-01A	0.0765156
TCGA-QH-A6CV-01A	3.14446
TCGA-TM-A7CF-02A	0.0293662
TCGA-DB-A64P-01A	0.51753
TCGA-HT-7485-01A	-0.523801
TCGA-HT-7687-01A	0.694883
TCGA-DU-5870-01A	0.227639
TCGA-E1-5302-01A	1.0311
TCGA-TQ-A7RR-01A	-0.0777996
TCGA-TM-A84T-01A	-0.503535
TCGA-FG-6688-01A	3.17793
TCGA-TM-A84H-01A	-0.415926
TCGA-DU-7294-01A	-0.149907
TCGA-DH-A66D-01A	0.592776
TCGA-DU-8161-01A	2.93891
TCGA-DU-A6S7-01A	0.340279
TCGA-DU-A7TA-01A	1.38972
TCGA-DU-A6S8-01A	-0.264579
TCGA-FG-A710-01A	0.350941
TCGA-CS-4941-01A	3.34911
TCGA-QH-A6CZ-01A	-0.0737515
TCGA-DU-7007-01A	1.63631
TCGA-HT-7467-01A	0.787067
TCGA-S9-A6TX-01A	-0.283115
TCGA-FG-A60L-01A	0.363353
TCGA-DB-A64Q-01A	-0.496183
TCGA-HT-A4DV-01A	-0.987844
TCGA-KT-A7W1-01A	2.66434
TCGA-TQ-A8XE-02A	1.43624
TCGA-DH-A7UT-01A	0.000598416
TCGA-HT-8114-01A	0.867168
TCGA-P5-A72U-01A	1.42982
TCGA-HT-8105-01A	0.915632
TCGA-FG-6691-01A	0.580844
TCGA-DU-5870-02A	1.28241
TCGA-HW-8322-01A	0.0087846
TCGA-DB-A75K-01A	0.235088
TCGA-HT-7681-01A	-0.146051
TCGA-HT-7469-01A	3.22041
TCGA-S9-A6WD-01A	-0.00418167
TCGA-DU-8168-01A	1.60663
TCGA-TM-A84J-01A	1.78109
TCGA-TM-A84S-01A	-0.157148
TCGA-TQ-A7RF-01A	0.480018
TCGA-DU-6392-01A	1.5811
TCGA-E1-A7YW-01A	-0.177408
TCGA-DU-A7TD-01A	3.24528
TCGA-HT-7474-01A	-0.292965
TCGA-DU-5855-01A	1.13312
TCGA-S9-A7QW-01A	-0.347135
TCGA-HT-A619-01A	1.11695
TCGA-HT-7692-01A	0.942706
TCGA-DU-6405-01A	3.17495
TCGA-E1-A7YQ-01A	2.81882
TCGA-WY-A85A-01A	-0.169815
TCGA-DU-5872-02A	0.452115
TCGA-DB-A64S-01A	0.931957
TCGA-CS-4943-01A	0.496631
TCGA-E1-A7YO-01A	-0.000675367
TCGA-TQ-A7RW-01A	1.28406
TCGA-DB-A4XA-01A	-0.913111
TCGA-DH-A669-01A	1.86897
TCGA-FG-8182-01A	-0.292129
TCGA-DB-A64R-01A	-0.533894
TCGA-RY-A847-01A	-0.672263
TCGA-HT-7476-01A	0.891242
TCGA-DU-A7T8-01A	0.389369
TCGA-DU-6394-01A	1.25237
TCGA-TM-A84F-01A	0.775459
TCGA-HW-7493-01A	0.585316
TCGA-DU-7009-01A	0.107035
TCGA-DU-5849-01A	0.0475142
TCGA-DU-5871-01A	-0.0345711
TCGA-RY-A845-01A	-0.65331
TCGA-HT-7676-01A	0.472578
TCGA-S9-A6WH-01A	0.17924
TCGA-DU-6407-02A	1.86906
TCGA-HT-8104-01A	3.20654
TCGA-HT-A618-01A	0.874582
TCGA-WY-A858-01A	0.508472
TCGA-DU-7010-01A	2.78791
TCGA-VM-A8CE-01A	-1.08145
TCGA-R8-A73M-01A	-0.46638
TCGA-E1-A7Z4-01A	-0.00811635
TCGA-HT-7874-01A	-0.238597
TCGA-DH-A7UU-01A	1.45554
TCGA-S9-A7IY-01A	-0.682476
TCGA-E1-A7YD-01A	2.84442
TCGA-S9-A7IQ-01A	-0.779419
TCGA-FG-A4MY-01A	1.30767
TCGA-HT-7605-01A	-0.823993
TCGA-DU-6406-01A	2.99595
TCGA-DU-6403-01A	2.66186
TCGA-HT-7473-01A	0.85059
TCGA-TQ-A7RG-01A	-0.44726
TCGA-P5-A72X-01A	-0.442392
TCGA-TM-A7CF-01A	-0.491504
TCGA-E1-5307-01A	1.24681
TCGA-WH-A86K-01A	0.459873
TCGA-E1-A7YM-01A	1.673
TCGA-HW-8319-01A	-0.331732
TCGA-HW-7495-01A	-1.14498
TCGA-DU-A6S2-01A	-0.694653
TCGA-P5-A5EV-01A	0.622463
TCGA-CS-5397-01A	3.39951
TCGA-RY-A840-01A	1.09343
TCGA-CS-6669-01A	0.414903
TCGA-HT-7694-01A	0.271545
TCGA-DU-8167-01A	0.340527
TCGA-FG-8186-01A	0.333844
TCGA-DB-5270-01A	0.62759
TCGA-FG-A70Y-01A	0.0404415
TCGA-HW-7487-01A	0.10678
TCGA-HT-7616-01A	1.62811
TCGA-QH-A65R-01A	0.796483
TCGA-HT-7686-01A	1.9585
TCGA-HT-8012-01A	-0.777259
TCGA-DU-6400-01A	0.204883
TCGA-DH-5141-01A	-0.653215
TCGA-HT-7873-01B	0.695719
TCGA-HT-7608-01A	0.368248
TCGA-FG-8188-01A	0.00203783
TCGA-HT-7606-01A	2.04454
TCGA-DU-6397-02A	1.12294
TCGA-P5-A5F4-01A	0.0489386
TCGA-DU-7292-01A	1.89194
TCGA-QH-A6X8-01A	0.646888
TCGA-S9-A6WG-01A	1.16695
TCGA-E1-A7YE-01A	2.57762
TCGA-S9-A6U5-01A	-0.149553
TCGA-W9-A837-01A	-0.606893
TCGA-F6-A8O4-01A	0.0497239
TCGA-FG-A60J-01A	-0.173554
TCGA-HT-7471-01A	0.669149
TCGA-CS-5396-01A	1.53168
TCGA-FG-A713-01A	-1.04841
TCGA-DH-A669-02A	1.0626
TCGA-WY-A85B-01A	1.23793
TCGA-HT-7691-01A	1.85451
TCGA-DU-6410-01A	1.18693
TCGA-TQ-A7RV-01A	0.0983083
TCGA-HT-7604-01A	0.675634
TCGA-HW-A5KJ-01A	1.27591
TCGA-S9-A7QX-01A	0.446896
TCGA-DU-8158-01A	1.83725
TCGA-HT-7688-01A	0.762931
TCGA-TM-A7C3-01A	0.933056
TCGA-HT-7472-01A	1.4383
TCGA-S9-A7R2-01A	2.31793
TCGA-VM-A8C8-01A	-0.0590506
TCGA-QH-A6CY-01A	-0.59109
TCGA-E1-A7YJ-01A	3.38637
TCGA-HT-8558-01A	-0.25716
TCGA-R8-A6MO-01A	0.448387
TCGA-CS-5394-01A	0.773058
TCGA-P5-A780-01A	0.989229
TCGA-R8-A6MK-01A	0.536511
TCGA-HT-A5R5-01A	0.321975
TCGA-HT-A74L-01A	-0.219972
TCGA-FN-7833-01A	1.80583
TCGA-DB-A64W-01A	1.63264
TCGA-DU-7018-01A	0.268038
TCGA-FG-8181-01A	-0.140651
TCGA-QH-A6CS-01A	1.63281
TCGA-VM-A8CH-01A	0.0756739
TCGA-TQ-A8XE-01A	0.593411
TCGA-FG-5965-02B	1.70412
TCGA-DU-6404-02B	1.14392
TCGA-DB-A4XB-01A	0.68284
TCGA-HT-7620-01A	0.0938926
TCGA-TM-A7C5-01A	-0.201244
TCGA-HT-A615-01A	0.468585
TCGA-DB-5274-01A	0.964815
TCGA-WY-A85E-01A	0.357273
TCGA-FG-A87N-01A	2.27401
TCGA-TM-A84G-01A	-0.327284
TCGA-DU-6397-01A	0.223757
TCGA-DH-A7UV-01A	0.15388
TCGA-HT-7857-01A	2.46418
TCGA-S9-A6TU-01A	0.908882
TCGA-FG-A6IZ-01A	0.255044
TCGA-E1-5303-01A	0.861952
TCGA-DU-7302-01A	0.855579
TCGA-HW-7491-01A	0.65487
TCGA-RY-A83X-01A	0.493789
TCGA-FG-5965-01B	0.839765
TCGA-FG-5962-01B	-0.111411
TCGA-DU-A5TY-01A	3.76395
TCGA-HW-7486-01A	-0.149861
TCGA-HT-7693-01A	1.21762
TCGA-DB-A75M-01A	-0.532077
TCGA-DU-7301-01A	1.28362
TCGA-KT-A74X-01A	0.440287
TCGA-P5-A5EZ-01A	0.901455
TCGA-VM-A8CB-01A	0.752564
TCGA-CS-5393-01A	0.604485
TCGA-DB-A4XF-01A	1.37187
TCGA-HT-A61B-01A	1.99797
TCGA-DB-A64O-01A	1.58877
TCGA-S9-A6WI-01A	-0.0549331
TCGA-S9-A7QZ-01A	0.102878
TCGA-VM-A8CD-01A	2.68836
TCGA-HT-7610-01A	-0.150252
TCGA-CS-6290-01A	0.5725
TCGA-P5-A5F1-01A	-0.0910958
TCGA-DU-7011-01A	0.61936
TCGA-DU-A7T6-01A	1.66085
TCGA-TM-A7CA-01A	0.104326
TCGA-HT-A5R7-01A	0.430387
TCGA-DU-6395-01A	0.298359
TCGA-HT-A74O-01A	1.08144
TCGA-FG-7637-01A	0.0496183
TCGA-CS-5395-01A	2.28253
TCGA-DU-7008-01A	0.182146
TCGA-TQ-A7RV-02A	0.235977
TCGA-DU-5847-01A	3.0852
TCGA-S9-A7R4-01A	0.371596
TCGA-CS-4942-01A	0.668725
TCGA-HT-7677-01A	-0.333564
TCGA-E1-5304-01A	1.47732
TCGA-TQ-A7RN-01A	-0.188473
TCGA-S9-A6WL-01A	1.05413
TCGA-QH-A6CW-01A	-0.351165
TCGA-FG-A87Q-01A	3.11307
TCGA-WY-A85C-01A	1.00099
TCGA-QH-A6X3-01A	0.821141
TCGA-S9-A6TV-01A	1.4991
TCGA-TM-A84C-01A	1.74277
TCGA-S9-A6WN-01A	2.82015
TCGA-FG-A4MX-01A	0.878321
TCGA-DB-A64U-01A	-0.876341
TCGA-DU-7014-01A	0.994455
TCGA-HT-7690-01A	0.669613
TCGA-QH-A6X5-01A	-0.820441
TCGA-QH-A86X-01A	-0.836373
TCGA-FG-A4MT-01A	0.231217
TCGA-DU-7015-01A	0.664355
TCGA-TQ-A7RH-01A	0.239471
TCGA-HT-A61A-01A	-0.288664
TCGA-E1-5318-01A	0.958069
TCGA-HT-7602-01A	-0.321305
TCGA-FG-A6J3-01A	2.51575
TCGA-HW-7489-01A	-0.025417
TCGA-HT-8018-01A	1.40921
TCGA-DB-5281-01A	1.19768
TCGA-DB-A64L-01A	-0.196938
TCGA-S9-A6WP-01A	0.379511
TCGA-E1-A7YU-01A	0.177771
TCGA-DU-A5TW-01A	0.628728
TCGA-S9-A6U8-01A	0.00879019
TCGA-DU-8164-01A	0.855066
TCGA-DU-8165-01A	2.86456
TCGA-P5-A5F6-01A	1.33941
TCGA-HT-7875-01A	-0.837329
TCGA-E1-A7Z6-01A	-0.623655
TCGA-HT-7882-01A	1.26678
TCGA-S9-A89Z-01A	3.29625
TCGA-DU-7300-01A	1.27864
TCGA-S9-A7J1-01A	-0.307861
TCGA-S9-A7R8-01A	1.57131
TCGA-DB-A4XE-01A	0.72504
TCGA-FG-A6J1-01A	0.179226
TCGA-DB-A64V-01A	0.136337
TCGA-DU-A6S3-01A	-0.803278
TCGA-DU-A7TB-01A	0.245721
TCGA-DU-6408-01A	0.948629
TCGA-TQ-A7RK-01A	0.277593
TCGA-S9-A7J3-01A	0.173336
TCGA-S9-A6TZ-01A	0.84339
TCGA-HT-7689-01A	0.0874241
TCGA-HT-A74H-01A	1.93566
TCGA-S9-A6U1-01A	0.288941
TCGA-TQ-A7RQ-01A	-0.843602
TCGA-E1-5305-01A	0.859831
TCGA-VM-A8C9-01A	0.879979
TCGA-RY-A83Y-01A	0.238238
TCGA-FG-8187-01A	-0.419448
TCGA-DB-A64X-01A	-0.165737
TCGA-DB-A4XD-01A	-0.391209
TCGA-HT-7611-01A	0.705262
TCGA-TM-A84L-01A	0.216766
TCGA-S9-A7R7-01A	2.10943
TCGA-DU-6401-01A	0.421612
TCGA-QH-A6X9-01A	-0.452927
TCGA-DB-A4XC-01A	0.176959
TCGA-F6-A8O3-01A	-0.176072
TCGA-DB-5278-01A	-1.17302
TCGA-HT-8563-01A	2.46788
TCGA-FG-8185-01A	0.562473
TCGA-E1-A7YH-01A	0.618129
TCGA-HW-A5KM-01A	0.368398
TCGA-E1-A7YV-01A	1.88803
TCGA-HT-A4DS-01A	2.02747
TCGA-HT-7483-01A	0.642923
TCGA-HT-7884-01B	-0.392523
TCGA-CS-6667-01A	1.05646
TCGA-DH-5143-01A	0.471288
TCGA-DB-A75O-01A	0.225134
TCGA-DU-5854-01A	2.84018
TCGA-P5-A72Z-01A	1.23943
TCGA-HW-A5KK-01A	2.58192
TCGA-TQ-A7RI-01A	-0.390114
TCGA-QH-A870-01A	0.0385129
TCGA-RY-A843-01A	0.143169
TCGA-HT-7475-01A	1.08406
TCGA-DU-A7TJ-01A	3.56917
TCGA-HW-7490-01A	0.0927889
TCGA-E1-5311-01A	0.487599
TCGA-DU-7299-01A	0.371772
TCGA-E1-A7YS-01A	1.95852
TCGA-S9-A7J2-01A	-0.878105
TCGA-E1-A7YI-01A	2.32537
TCGA-DU-A76K-01A	1.30421
TCGA-HT-8019-01A	-0.222852
TCGA-HT-7468-01A	0.400237
TCGA-DH-5140-01A	1.83748
TCGA-VW-A7QS-01A	0.838597
TCGA-S9-A6U9-01A	-0.128638
TCGA-FG-7634-01A	0.751609
TCGA-P5-A77X-01A	-0.171195
TCGA-HT-8010-01A	-0.808182
TCGA-S9-A6U2-01A	-1.00716
TCGA-HT-8113-01A	-0.134333
TCGA-S9-A6TS-01A	-0.250042
TCGA-S9-A7R3-01A	-0.090875
TCGA-E1-A7Z2-01A	1.84392
TCGA-DU-7309-01A	0.0922577
TCGA-HW-8320-01A	0.535054
TCGA-CS-6668-01A	-0.112516
TCGA-S9-A6U6-01A	-0.206701
TCGA-FG-5965-02A	2.67804
TCGA-DU-6393-01A	1.60441
TCGA-HT-A74J-01A	0.18618
TCGA-E1-A7YL-01A	2.29369
TCGA-QH-A6XC-01A	2.62934
TCGA-HT-7609-01A	0.583024
TCGA-QH-A65X-01A	1.11225
TCGA-P5-A731-01A	0.279282
TCGA-HT-7695-01A	-0.387122
TCGA-FG-A4MW-01A	3.13924
TCGA-E1-A7Z3-01A	-0.282431
TCGA-P5-A5F0-01A	0.069339
TCGA-DH-A66F-01A	-1.07411
TCGA-HT-8110-01A	2.74827
TCGA-VW-A8FI-01A	2.81009
TCGA-S9-A7R1-01A	-0.621353
TCGA-DU-7019-01A	1.15396
TCGA-QH-A65V-01A	-0.409893
TCGA-DB-5280-01A	-0.818597
TCGA-FG-A60K-01A	-0.993095
TCGA-HT-7479-01A	0.165004
TCGA-P5-A737-01A	-0.641521
TCGA-IK-7675-01A	3.02871
TCGA-S9-A6WE-01A	-1.26484
TCGA-QH-A6CU-01A	-0.432609
TCGA-P5-A781-01A	-0.548808
TCGA-FG-A711-01A	0.0949319
TCGA-HT-8108-01A	0.323392
TCGA-DU-A7TG-01A	0.328219
TCGA-FG-A4MU-01B	2.71708
TCGA-TM-A84Q-01A	1.37691
TCGA-DU-6407-01A	1.33037
TCGA-DU-7013-01A	3.13113
TCGA-HT-8109-01A	-0.217087
TCGA-DU-6407-02B	2.00408
TCGA-E1-A7YY-01A	0.537708
TCGA-DU-A6S6-01A	-1.02435
TCGA-HT-8013-01A	1.08709
TCGA-CS-6670-01A	-0.595921
TCGA-E1-5319-01A	-0.208577
TCGA-TQ-A7RK-02B	0.959384
TCGA-TQ-A7RM-01A	2.3539
TCGA-HT-7680-01A	0.423819
TCGA-HT-7902-01A	0.211498
TCGA-TQ-A7RO-01A	-0.217825
TCGA-DU-A7TI-01A	-0.000424166
TCGA-HT-7607-01A	0.739876
TCGA-P5-A5EW-01A	-0.226392
TCGA-CS-4944-01A	0.209194
TCGA-TM-A7C4-01A	-0.227222
TCGA-DU-A5TS-01A	0.51478
TCGA-QH-A6X4-01A	0.0573409
TCGA-P5-A5F2-01A	0.130647
TCGA-DU-7006-01A	2.4205
TCGA-HT-A617-01A	2.11567
TCGA-P5-A72W-01A	0.864034
TCGA-FG-7643-01A	0.766342
TCGA-DU-5874-01A	0.837164
TCGA-S9-A7QY-01A	-0.48827
TCGA-DB-A4XH-01A	-0.234499
TCGA-VV-A86M-01A	0.641196
TCGA-HW-8321-01A	0.590299
TCGA-DB-A75L-01A	0.547955
TCGA-HT-8564-01A	2.21116
TCGA-DU-6404-02A	-0.127089
TCGA-DU-A5TP-01A	0.38656
TCGA-CS-6666-01A	0.995633
TCGA-DU-7012-01A	3.32092
TCGA-HT-A5R9-01A	0.405339
TCGA-E1-A7YK-01A	1.95675
TCGA-HT-7856-01A	0.0127871
TCGA-VM-A8CF-01A	0.812664
TCGA-HT-8111-01A	0.963374
TCGA-HT-7881-01A	-0.624283
TCGA-DU-7304-01A	0.86436
TCGA-DU-5853-01A	-0.25639
TCGA-CS-4938-01B	0.416719
TCGA-VM-A8CA-01A	-0.35704
TCGA-S9-A6U0-01A	2.97749
TCGA-DU-6402-01A	2.55091
TCGA-DH-A7US-01A	-0.854111
TCGA-TM-A84R-01A	-0.0737289
TCGA-HT-7860-01A	3.13002
TCGA-P5-A730-01A	1.57941
TCGA-DU-A5TT-01A	2.36826
TCGA-R8-A6ML-01A	-0.663167
TCGA-P5-A735-01A	-0.408152
TCGA-DU-6404-01A	1.14109
TCGA-HT-7854-01A	1.18011
TCGA-TM-A84I-01A	2.78121
TCGA-HT-7481-01A	0.551632
TCGA-P5-A733-01A	-0.309633
TCGA-DU-A7TC-01A	0.309466
TCGA-DU-8166-01A	-0.280428
TCGA-E1-5322-01A	1.14055
TCGA-DU-A76R-01A	0.952834
TCGA-DB-5277-01A	1.19979
TCGA-HT-7877-01A	-0.0776416
TCGA-HT-7684-01A	-0.0624531
TCGA-S9-A6UB-01A	-0.191656
TCGA-S9-A6TY-01A	0.667085
TCGA-HT-8107-01A	0.226639
TCGA-HT-7470-01A	-0.20068
TCGA-HT-7601-01A	1.85796
TCGA-FG-5964-01A	1.08713
TCGA-DU-A76O-01A	-0.0396603
TCGA-P5-A5EY-01A	0.74456
TCGA-DU-7298-01A	1.70959
TCGA-WY-A85D-01A	-0.34572
TCGA-EZ-7264-01A	-0.377351
TCGA-DB-A75P-01A	0.219264
TCGA-QH-A65Z-01A	-0.603307
TCGA-QH-A6XA-01A	-0.368049
TCGA-DH-A66B-01A	1.95728
TCGA-S9-A7IX-01A	2.22936
TCGA-DB-5279-01A	-1.07904
TCGA-HT-A5RB-01A	-0.2777
TCGA-FG-7641-01B	-0.575593
TCGA-DB-A4X9-01A	-0.162085
TCGA-FG-7638-01B	-0.00585497
TCGA-DU-6399-01A	0.101329
TCGA-DU-8163-01A	0.459667
TCGA-P5-A77W-01A	-0.480366
TCGA-S9-A6WM-01A	3.3128
TCGA-DU-A76L-01A	2.18925
TCGA-HT-A614-01A	-0.107182
TCGA-CS-6186-01A	2.60694
TCGA-QH-A65S-01A	0.302097
TCGA-HT-7478-01A	1.04908
TCGA-HT-A61C-01A	2.26678
TCGA-HT-A5RA-01A	2.14815
TCGA-TQ-A7RK-02A	0.700545
TCGA-DU-7290-01A	3.74381
TCGA-WY-A859-01A	0.0688955
TCGA-HT-7482-01A	0.137534
TCGA-HT-8015-01B	1.63857
TCGA-P5-A736-01A	-0.190142
TCGA-DB-5275-01A	0.334899
TCGA-P5-A5EX-01A	1.45239
TCGA-S9-A7IZ-01A	0.830073
TCGA-DU-7306-01A	0.790221
TCGA-RY-A83Z-01A	1.63047
TCGA-DB-A4XG-01A	0.474336
TCGA-S9-A89V-01A	0.757374
TCGA-TM-A84O-01A	0.963886
TCGA-TM-A84B-01A	1.99549
TCGA-DU-7304-02A	0.77553
TCGA-DU-6396-01A	1.88925
TCGA-DU-5852-01A	2.5134
TCGA-FG-A4MT-02A	0.346117
TCGA-HT-8011-01A	2.41178
TCGA-DH-5144-01A	-0.22398
TCGA-HT-7855-01A	0.525684
TCGA-FG-6690-01A	-0.259284
TCGA-HT-7879-01A	0.321484
TCGA-FG-8191-01A	-0.260527
TCGA-HT-7603-01A	-0.657461
TCGA-DH-5142-01A	1.43893
TCGA-QH-A6CX-01A	2.205
TCGA-FG-8189-01B	-0.0774183
TCGA-E1-A7YN-01A	2.44465
TCGA-CS-6188-01A	3.13529
TCGA-HT-A74K-01A	0.370546
TCGA-FG-7636-01A	-0.0587583
TCGA-DU-5872-01A	0.904388
TCGA-HT-7480-01A	-0.522348
TCGA-FG-A70Z-01A	1.9794
TCGA-IK-8125-01A	0.249228
TCGA-FG-5963-01A	1.66571
TCGA-TQ-A7RP-01A	1.30809
TCGA-HT-7880-01A	0.0158913
TCGA-DH-A7UR-01A	1.16449
TCGA-S9-A6UA-01A	1.32895
TCGA-S9-A6TW-01A	0.729904
TCGA-HT-A5RC-01A	3.26564
TCGA-HT-A616-01A	-0.53102
TCGA-DU-A5TR-01A	1.54199
TCGA-FG-5963-02A	1.617
TCGA-HT-7477-01B	2.49677
TCGA-FG-6689-01A	-0.25645
TCGA-DB-5273-01A	0.409973
TCGA-VV-A829-01A	1.35342
TCGA-DH-A66G-01A	0.883829
TCGA-FG-6692-01A	2.99845
TCGA-TQ-A7RJ-01A	-0.076973
TCGA-S9-A7J0-01A	1.55286
CGGA_1002	2.10077
CGGA_1003	1.0885
CGGA_1010	1.33895
CGGA_1012	2.42002
CGGA_1014	2.62799
CGGA_1018	1.72887
CGGA_103	1.1584
CGGA_1030	1.21949
CGGA_1032	0.954005
CGGA_1033	0.170016
CGGA_1037	0.275126
CGGA_1048	1.20492
CGGA_1051	0.5055
CGGA_1055	1.71436
CGGA_1057	2.07533
CGGA_1058	1.72452
CGGA_106	1.6371
CGGA_1065	1.64479
CGGA_1066	2.43328
CGGA_107	3.76031
CGGA_108	2.84725
CGGA_1087	1.01779
CGGA_1097	2.87629
CGGA_1100	0.18536
CGGA_1101	0.0371817
CGGA_1108	2.89094
CGGA_1111	1.67664
CGGA_112	1.60685
CGGA_1120	1.38476
CGGA_1121	0.17091
CGGA_1126	2.08237
CGGA_1127	0.913156
CGGA_1131	2.68742
CGGA_1132	0.581639
CGGA_1137	1.60668
CGGA_1141	1.52104
CGGA_1144	0.520079
CGGA_1147	0.0346655
CGGA_1148	2.57009
CGGA_1152	1.77723
CGGA_1154	1.81852
CGGA_1155	1.46369
CGGA_1156	1.00879
CGGA_1157	1.67325
CGGA_1158	0.959637
CGGA_1159	0.856652
CGGA_1161	-0.0571693
CGGA_1162	0.186164
CGGA_1169	0.720568
CGGA_1178	2.26088
CGGA_1181	1.04927
CGGA_1183	3.52439
CGGA_1184	1.11512
CGGA_1185	2.24826
CGGA_1191	1.05499
CGGA_1192	1.54158
CGGA_1195	1.97786
CGGA_1198	0.82871
CGGA_1204	0.639628
CGGA_1205	1.64851
CGGA_1207	0.903947
CGGA_1211	0.568129
CGGA_1212	0.762546
CGGA_1223	2.67481
CGGA_1226	2.06321
CGGA_1228	1.46231
CGGA_1232	1.15558
CGGA_1235	0.340436
CGGA_1238	0.75382
CGGA_1239	0.452067
CGGA_1264	0.329289
CGGA_1269	1.61217
CGGA_1273	1.59653
CGGA_1286	0.767641
CGGA_1291	0.068845
CGGA_1295	2.63796
CGGA_1300	1.5554
CGGA_1303	0.84331
CGGA_1305	1.08486
CGGA_1309	1.3364
CGGA_1311	2.31963
CGGA_1317	0.656042
CGGA_1318	2.62368
CGGA_1319	0.967638
CGGA_1321	2.87879
CGGA_1334	1.57896
CGGA_1335	0.520404
CGGA_1339	0.264648
CGGA_1345	2.04495
CGGA_135	2.7913
CGGA_1350	0.37273
CGGA_1356	1.19359
CGGA_1359	2.90599
CGGA_1361	0.054577
CGGA_1362	1.65861
CGGA_1368	0.930127
CGGA_1369	1.38502
CGGA_1377	1.28928
CGGA_1383	1.18161
CGGA_1386	0.679105
CGGA_1389	0.943306
CGGA_1390	1.62068
CGGA_1398	1.05455
CGGA_1400	0.140457
CGGA_1401	1.06445
CGGA_1404	1.77709
CGGA_1407	0.326427
CGGA_1413	0.198788
CGGA_1416	1.68949
CGGA_1417	1.25979
CGGA_1421	0.217394
CGGA_1424	0.499857
CGGA_1427	0.683484
CGGA_1431	0.732553
CGGA_1434	2.83338
CGGA_1435	2.7476
CGGA_1437	0.119933
CGGA_1440	-0.207962
CGGA_1443	1.63082
CGGA_1445	3.00888
CGGA_1446	0.404028
CGGA_1447	1.38106
CGGA_1454	0.51945
CGGA_1455	0.464166
CGGA_1458	1.0792
CGGA_1459	4.07794
CGGA_1463	0.590822
CGGA_1469	0.396748
CGGA_1471	2.55983
CGGA_1473	1.48648
CGGA_1474	1.43519
CGGA_1477	1.62688
CGGA_1482	0.362598
CGGA_1487	2.48016
CGGA_1488	0.768306
CGGA_1497	3.02986
CGGA_1502	0.345993
CGGA_1504	1.46848
CGGA_1508	0.30392
CGGA_1510	1.81361
CGGA_1513	0.508359
CGGA_1514	1.76897
CGGA_1516	0.705783
CGGA_1517	0.205685
CGGA_1518	1.89626
CGGA_1523	2.29442
CGGA_1524	0.507046
CGGA_1525	0.92339
CGGA_1526	0.932658
CGGA_1527	1.21597
CGGA_1528	0.68628
CGGA_1530	-0.269656
CGGA_1533	1.51992
CGGA_1536	1.31027
CGGA_1544	1.55385
CGGA_1552	0.433139
CGGA_1553	2.42048
CGGA_1554	1.55996
CGGA_1557	1.41894
CGGA_1562	-0.0384925
CGGA_1563	1.61888
CGGA_1565	0.415179
CGGA_1566	1.44711
CGGA_1567	2.37393
CGGA_1568	1.08215
CGGA_1569	0.0441612
CGGA_157	1.08806
CGGA_1575	3.12992
CGGA_1579	0.137631
CGGA_1580	0.967263
CGGA_1583	-0.219823
CGGA_1587	3.39424
CGGA_1588	0.880094
CGGA_1589	1.32698
CGGA_1591	1.52105
CGGA_1592	1.80541
CGGA_1594	0.0100374
CGGA_1598	2.53824
CGGA_1606	3.10926
CGGA_1607	1.29442
CGGA_1608	2.64269
CGGA_1610	-0.0434274
CGGA_1614	1.4358
CGGA_1617	-0.37944
CGGA_1618	0.945603
CGGA_1619	2.7479
CGGA_1620	0.498505
CGGA_1621	0.329958
CGGA_1623	0.995087
CGGA_1627	1.03669
CGGA_1630	-0.0407
CGGA_1640	0.378644
CGGA_1642	0.714674
CGGA_1645	0.80425
CGGA_1647	0.361505
CGGA_1648	0.473532
CGGA_1649	0.295777
CGGA_165	0.622693
CGGA_1651	1.20436
CGGA_1653	-0.121885
CGGA_1655	1.15857
CGGA_1657	0.0806731
CGGA_1661	0.215272
CGGA_1662	0.988751
CGGA_1664	0.461345
CGGA_1667	0.88556
CGGA_1669	2.69105
CGGA_1670	1.95944
CGGA_1671	2.15341
CGGA_1673	0.862827
CGGA_1675	3.11261
CGGA_1679	-0.204972
CGGA_1680	2.9856
CGGA_1685	2.65769
CGGA_1686	1.26967
CGGA_1688	1.43134
CGGA_1689	0.398709
CGGA_1693	1.32493
CGGA_1695	0.766952
CGGA_1696	1.64918
CGGA_1700	2.20629
CGGA_1701	0.474566
CGGA_1703	1.60942
CGGA_1704	0.613855
CGGA_1714	1.58602
CGGA_1715	1.75953
CGGA_1716	3.35692
CGGA_1718	1.38325
CGGA_1720	2.14174
CGGA_1721	1.44757
CGGA_1723	0.633414
CGGA_1725	1.76424
CGGA_1731	2.1725
CGGA_1737	1.00809
CGGA_1738	3.60308
CGGA_1739	2.40429
CGGA_1743	0.528328
CGGA_1745	0.656702
CGGA_1747	1.05854
CGGA_1760	2.4183
CGGA_1771	1.68673
CGGA_1786	1.21769
CGGA_1791	1.69115
CGGA_1809	2.2473
CGGA_1829	0.575304
CGGA_1850	0.803938
CGGA_1854	0.744111
CGGA_1862	3.49359
CGGA_1863	0.794097
CGGA_1875	2.0622
CGGA_1880	1.10332
CGGA_1882	0.559776
CGGA_1902	1.78261
CGGA_1903	-0.766614
CGGA_1906	2.07081
CGGA_194	0.37839
CGGA_1994	0.486462
CGGA_2002	1.15246
CGGA_2006	2.2394
CGGA_2013	1.46247
CGGA_2046	2.69468
CGGA_2079	2.50651
CGGA_2081	1.65779
CGGA_2121	1.33092
CGGA_2129	2.29951
CGGA_265	0.951415
CGGA_279	2.4363
CGGA_28	0.642644
CGGA_288	1.22102
CGGA_290	1.62359
CGGA_320	0.400645
CGGA_336	1.83732
CGGA_358	0.963018
CGGA_369	0.873918
CGGA_406	2.94842
CGGA_42	0.956193
CGGA_420	1.67215
CGGA_457	2.40659
CGGA_474	2.55979
CGGA_482	1.30592
CGGA_492	2.51775
CGGA_503	1.07699
CGGA_507	1.1813
CGGA_521	2.41358
CGGA_554	1.54399
CGGA_583	0.567002
CGGA_619	2.61436
CGGA_625	1.11231
CGGA_634	0.653475
CGGA_652	2.32237
CGGA_663	0.768609
CGGA_703	1.79794
CGGA_705	1.04673
CGGA_707	0.220283
CGGA_720	2.25904
CGGA_721	0.591
CGGA_724	-0.14958
CGGA_730	0.649382
CGGA_763	0.683955
CGGA_780	2.34638
CGGA_799	1.49203
CGGA_809	0.329862
CGGA_810	2.92683
CGGA_825	1.53021
CGGA_846	1.03165
CGGA_852	3.64635
CGGA_861	2.1213
CGGA_863	0.543201
CGGA_867	2.99858
CGGA_881	3.20635
CGGA_882	1.43666
CGGA_888	2.60747
CGGA_889	1.20499
CGGA_890	1.45634
CGGA_901	1.34461
CGGA_903	2.24809
CGGA_D19	2.80203
CGGA_D28	0.893931
CGGA_D50	1.64505
CGGA_J50	1.26133
CGGA_J73	1.84778
CGGA_P103	0.406271
CGGA_P104	2.1199
CGGA_P108	2.88662
CGGA_P110	3.19029
CGGA_P111	0.564628
CGGA_P113	0.780584
CGGA_P115	1.83191
CGGA_P121	0.045441
CGGA_P122	1.56932
CGGA_P128	0.955469
CGGA_P13	0.203924
CGGA_P131	1.41732
CGGA_P132	0.997348
CGGA_P137	0.817661
CGGA_P142	0.173122
CGGA_P144	0.612985
CGGA_P145	-0.188176
CGGA_P147	2.28384
CGGA_P151	0.640147
CGGA_P153	0.699984
CGGA_P155	2.01534
CGGA_P156	0.600884
CGGA_P157	3.96886
CGGA_P158	0.684255
CGGA_P159	3.82182
CGGA_P163	2.32094
CGGA_P165	1.04468
CGGA_P17	1.13416
CGGA_P172	1.35774
CGGA_P173	1.46754
CGGA_P174	1.18058
CGGA_P176	0.58542
CGGA_P177	1.91113
CGGA_P179	1.32927
CGGA_P18	1.20763
CGGA_P181	2.01448
CGGA_P183	1.64707
CGGA_P185	2.79879
CGGA_P19	1.32531
CGGA_P20	0.910732
CGGA_P21	1.71534
CGGA_P23	2.11625
CGGA_P265	2.82079
CGGA_P266	1.60974
CGGA_P269	2.36249
CGGA_P27	1.18906
CGGA_P271	0.332361
CGGA_P279	0.429015
CGGA_P286	1.07018
CGGA_P29	1.6643
CGGA_P3	0.976364
CGGA_P30	1.94767
CGGA_P306	0.705748
CGGA_P308	1.24508
CGGA_P31	1.06683
CGGA_P310	-0.0329109
CGGA_P311	2.6972
CGGA_P314	1.25168
CGGA_P315	1.60839
CGGA_P316	1.23243
CGGA_P319	2.22881
CGGA_P326	0.439651
CGGA_P328	2.92736
CGGA_P337	1.24334
CGGA_P338	1.6503
CGGA_P346	2.69603
CGGA_P356	1.44408
CGGA_P358	1.90973
CGGA_P364	2.82147
CGGA_P388	2.30667
CGGA_P392	0.998008
CGGA_P399	1.36143
CGGA_P416	0.969707
CGGA_P421	2.06672
CGGA_P422	0.384329
CGGA_P437	1.77814
CGGA_P438	0.251874
CGGA_P439	1.17762
CGGA_P446	2.26766
CGGA_P461	2.64294
CGGA_P468	2.47023
CGGA_P483	2.4641
CGGA_P492	1.03438
CGGA_P5	2.4817
CGGA_P500	0.210685
CGGA_P501	1.47724
CGGA_P505	0.438456
CGGA_P508	1.32261
CGGA_P510	2.2111
CGGA_P520	2.48062
CGGA_P568	1.94512
CGGA_P594	3.20765
CGGA_P604	1.73528
CGGA_P633	2.14145
CGGA_P83	0.928677
CGGA_P84	1.20271
CGGA_P86	1.24757
CGGA_P93	1.53788
CGGA_P98	1.0546
CGGA_1006	2.30961
CGGA_1022	1.76181
CGGA_1034	3.09703
CGGA_1079	3.48862
CGGA_1081	1.87489
CGGA_1140	0.264232
CGGA_1145	3.47635
CGGA_1263	1.60184
CGGA_1280	4.15636
CGGA_1281	0.499094
CGGA_1284	3.97363
CGGA_1292	1.37391
CGGA_1340	2.15954
CGGA_1408	3.70914
CGGA_1411	2.4037
CGGA_235	0.706226
CGGA_269	0.75929
CGGA_276	0.395466
CGGA_323	-0.0371582
CGGA_330	3.12854
CGGA_426	2.7344
CGGA_448	2.44003
CGGA_488	0.227096
CGGA_493	-0.480687
CGGA_541	0.142217
CGGA_564	2.74452
CGGA_565	1.78016
CGGA_578	2.09223
CGGA_599	1.811
CGGA_616	2.90907
CGGA_630	0.315289
CGGA_633	1.08844
CGGA_638	0.436792
CGGA_643	1.08381
CGGA_659	-0.217317
CGGA_678	2.90891
CGGA_727	3.13101
CGGA_766	1.53604
CGGA_791	2.5384
CGGA_796	2.35965
CGGA_807	-0.397649
CGGA_871	0.448587
CGGA_D11	2.40468
CGGA_D16	2.99947
CGGA_D44	1.96404
CGGA_D58	1.61156
CGGA_J030	-0.0121174
CGGA_J130	1.00751
CGGA_1005	0.664572
CGGA_1013	0.211463
CGGA_1020	1.26054
CGGA_1027	0.889283
CGGA_1031	0.673354
CGGA_1046	-0.0754683
CGGA_1061	0.805531
CGGA_1094	2.36988
CGGA_1113	1.86791
CGGA_1146	0.795385
CGGA_1160	2.34401
CGGA_1189	0.264164
CGGA_1190	1.85571
CGGA_1215	3.0772
CGGA_1231	2.84896
CGGA_1307	3.35225
CGGA_1322	1.91471
CGGA_1329	3.04575
CGGA_1330	3.25048
CGGA_1374	1.47118
CGGA_1388	1.72755
CGGA_1406	3.24647
CGGA_236	1.40295
CGGA_241	0.100514
CGGA_245	2.46777
CGGA_251	-1.1304
CGGA_252	0.945259
CGGA_254	-0.891891
CGGA_256	0.458993
CGGA_261	0.0172206
CGGA_267	-0.377904
CGGA_273	0.229372
CGGA_283	-0.291599
CGGA_300	2.02523
CGGA_314	0.195922
CGGA_333	0.844942
CGGA_337	1.92183
CGGA_400	1.20397
CGGA_431	2.09601
CGGA_446	0.635473
CGGA_458	1.16551
CGGA_479	-0.335139
CGGA_485	0.329214
CGGA_490	-0.40455
CGGA_501	-0.63594
CGGA_502	0.696264
CGGA_510	-0.649058
CGGA_543	-0.500962
CGGA_551	-0.407104
CGGA_560	0.873862
CGGA_580	0.915713
CGGA_591	0.589123
CGGA_598	0.354399
CGGA_601	0.474566
CGGA_603	1.73059
CGGA_605	1.6757
CGGA_607	1.00835
CGGA_632	2.41421
CGGA_635	0.877664
CGGA_641	0.609689
CGGA_642	0.0612627
CGGA_655	0.50707
CGGA_662	0.272457
CGGA_666	0.687131
CGGA_671	-0.430898
CGGA_675	0.209047
CGGA_685	0.725479
CGGA_689	1.2813
CGGA_694	1.73598
CGGA_698	1.51989
CGGA_704	0.254058
CGGA_715	-0.460585
CGGA_725	0.147807
CGGA_752	0.752201
CGGA_757	1.32372
CGGA_760	0.315887
CGGA_762	-0.0535992
CGGA_785	0.231188
CGGA_812	0.669601
CGGA_815	2.26634
CGGA_818	1.82571
CGGA_834	3.04209
CGGA_835	0.636042
CGGA_838	0.504537
CGGA_843	0.303685
CGGA_856	0.709631
CGGA_858	-0.652999
CGGA_864	0.498299
CGGA_884	0.582033
CGGA_892	-0.507329
CGGA_893	0.237975
CGGA_898	0.0828405
CGGA_904	0.996742
CGGA_905	0.381331
CGGA_908	0.622872
CGGA_909	-0.274662
CGGA_D04	0.110208
CGGA_D07	-0.00185692
CGGA_D15	-0.140559
CGGA_D20	0.00636942
CGGA_D21	3.07193
CGGA_D24	1.76017
CGGA_D27	1.16142
CGGA_D29	0.1683
CGGA_D33	1.5818
CGGA_D40	-0.0735941
CGGA_D45	0.940981
CGGA_D46	3.9836
CGGA_D47	2.35337
CGGA_D48	1.88438
CGGA_D52	1.06999
CGGA_D56	1.75374
CGGA_277	0.647822
CGGA_J023	2.56635
CGGA_J024	0.499249
CGGA_J042	2.48234
CGGA_1004	2.70632
CGGA_1059	2.55636
CGGA_1071	2.80047
CGGA_1118	3.24835
CGGA_1246	0.460561
CGGA_243	1.06064
CGGA_247	2.28874
CGGA_738	0.930547
