# Supplementary material for: Ubiquitin-proteasome system-mediated ubiquitination modification patterns and characterization of tumor microenvironment infiltration, stemness and cellular senescence in low-grade glioma
Source: Aging (Albany NY). 2023 Apr 11;15(8):2970–98. doi: 10.18632/aging.204650 (PMC10188348; doi:10.18632/aging.204650)
Supplement: Supplementary Table 5 [file aging-15-204650-s005.xlsx]

## Sheet: Sheet1
Supplementary Table 5. Immune score and stromal score.
Immune score and Stromal score
ID	StromalScore	ImmuneScore
TCGA-S9-A6WQ-01A	-681.943	478.621
TCGA-S9-A7IS-01A	-1254.72	-456.168
TCGA-DU-8162-01A	-736.839	-611.73
TCGA-HT-7858-01A	-602.482	744.926
TCGA-DU-A5TU-01A	-452.196	838.709
TCGA-S9-A6WO-01A	-928.063	289.369
TCGA-TM-A84M-01A	-1601.98	-1044.27
TCGA-HW-A5KL-01A	-952.019	-58.9929
TCGA-QH-A6CV-01A	-626.684	542.416
TCGA-TM-A7CF-02A	-1490.98	-879.876
TCGA-DB-A64P-01A	-874.658	-331.179
TCGA-HT-7485-01A	-803.939	-134.348
TCGA-HT-7687-01A	-956.323	-346.757
TCGA-DU-5870-01A	-767.575	-243.446
TCGA-E1-5302-01A	-549.228	472.973
TCGA-TQ-A7RR-01A	-798.031	40.1462
TCGA-TM-A84T-01A	-958.538	-111.444
TCGA-FG-6688-01A	-350.023	739.187
TCGA-TM-A84H-01A	-1379.07	-626.755
TCGA-DU-7294-01A	-1170.94	-746.253
TCGA-DH-A66D-01A	-721.784	393.755
TCGA-DU-8161-01A	-25.937	1030.31
TCGA-DU-A6S7-01A	-916.952	209.912
TCGA-DU-A7TA-01A	-544.175	388.126
TCGA-DU-A6S8-01A	-1351.35	-856.461
TCGA-FG-A710-01A	-602.406	625.201
TCGA-CS-4941-01A	-364.794	903.033
TCGA-QH-A6CZ-01A	-1286.74	-1037.41
TCGA-DU-7007-01A	124.792	672.945
TCGA-HT-7467-01A	-978.366	-735.788
TCGA-S9-A6TX-01A	-1125.39	-530.747
TCGA-FG-A60L-01A	-611.187	563.378
TCGA-DB-A64Q-01A	-1351.76	-694.322
TCGA-HT-A4DV-01A	-1025.62	-368.251
TCGA-KT-A7W1-01A	-1035.24	-371.133
TCGA-TQ-A8XE-02A	-619.36	348.289
TCGA-DH-A7UT-01A	-943.725	90.4211
TCGA-HT-8114-01A	-132.898	791.089
TCGA-P5-A72U-01A	313.59	756.945
TCGA-HT-8105-01A	-1186.36	-534.766
TCGA-FG-6691-01A	-324.02	790.517
TCGA-DU-5870-02A	-1376.07	-683.88
TCGA-HW-8322-01A	-1221.23	-457.461
TCGA-DB-A75K-01A	-701.704	228.876
TCGA-HT-7681-01A	-888.661	-328.604
TCGA-HT-7469-01A	-1120.81	-529.561
TCGA-S9-A6WD-01A	-1389.14	-851.047
TCGA-DU-8168-01A	-1634.48	-1014.3
TCGA-TM-A84J-01A	-927.953	-875.274
TCGA-TM-A84S-01A	-964.936	-246.746
TCGA-TQ-A7RF-01A	-1146.31	-162.688
TCGA-DU-6392-01A	-286.002	239.67
TCGA-E1-A7YW-01A	-1009.05	-81.9226
TCGA-DU-A7TD-01A	-224.21	946.851
TCGA-HT-7474-01A	-1039.6	-751.111
TCGA-DU-5855-01A	-658.728	459.704
TCGA-S9-A7QW-01A	-1458.17	-932.757
TCGA-HT-A619-01A	-1546.45	-1050.24
TCGA-HT-7692-01A	-1195.49	-462.147
TCGA-DU-6405-01A	-891.411	-12.2902
TCGA-E1-A7YQ-01A	255.574	1341.42
TCGA-WY-A85A-01A	-1155.49	-250.439
TCGA-DU-5872-02A	916.252	2437.75
TCGA-DB-A64S-01A	-324.631	687.981
TCGA-CS-4943-01A	-845.27	-120.276
TCGA-E1-A7YO-01A	-1220.11	-1028.54
TCGA-TQ-A7RW-01A	-504.065	667.587
TCGA-DB-A4XA-01A	-821.889	-72.7821
TCGA-DH-A669-01A	-991.573	-63.8099
TCGA-FG-8182-01A	-803.173	203.241
TCGA-DB-A64R-01A	-1390.62	-1097.04
TCGA-RY-A847-01A	-735.414	102.071
TCGA-HT-7476-01A	-330.489	-363.511
TCGA-DU-A7T8-01A	-424.502	308.222
TCGA-DU-6394-01A	-1158.09	-503.864
TCGA-TM-A84F-01A	-242.594	1373.88
TCGA-HW-7493-01A	-240.325	148.002
TCGA-DU-7009-01A	-1362.78	-1134.5
TCGA-DU-5849-01A	-1122.81	-583.959
TCGA-DU-5871-01A	-892.831	188.113
TCGA-RY-A845-01A	-1116.33	-396.489
TCGA-HT-7676-01A	-712.063	587.275
TCGA-S9-A6WH-01A	-1419.17	-737.645
TCGA-DU-6407-02A	-856.557	306.234
TCGA-HT-8104-01A	-587.116	-268.85
TCGA-HT-A618-01A	-370.972	1198.87
TCGA-WY-A858-01A	-108.671	957.853
TCGA-DU-7010-01A	-707.231	-490.471
TCGA-VM-A8CE-01A	-940.045	-557.523
TCGA-R8-A73M-01A	-1487.41	-890.404
TCGA-E1-A7Z4-01A	-1048.27	349.757
TCGA-HT-7874-01A	-1134.41	-1001.17
TCGA-DH-A7UU-01A	-1085.96	-390.075
TCGA-S9-A7IY-01A	-791.36	368.06
TCGA-E1-A7YD-01A	-927.676	-269.376
TCGA-S9-A7IQ-01A	-1333.35	-1396.47
TCGA-FG-A4MY-01A	-1025.74	-334.782
TCGA-HT-7605-01A	-996.93	-775.865
TCGA-DU-6406-01A	-730.487	126.762
TCGA-DU-6403-01A	-771.502	365.035
TCGA-HT-7473-01A	-90.3358	1205.76
TCGA-TQ-A7RG-01A	-970.977	-261.623
TCGA-P5-A72X-01A	-652.973	-352.385
TCGA-TM-A7CF-01A	-1366.06	-1001.01
TCGA-E1-5307-01A	-1039.31	-128.345
TCGA-WH-A86K-01A	-931.482	-128.55
TCGA-E1-A7YM-01A	-1071.07	-361.571
TCGA-HW-8319-01A	-1037.18	-577.699
TCGA-HW-7495-01A	-1179.9	-1038.22
TCGA-DU-A6S2-01A	-1337.06	-922.487
TCGA-P5-A5EV-01A	-1002.1	-101.326
TCGA-CS-5397-01A	-381.602	30.8598
TCGA-RY-A840-01A	-1505.54	-739.122
TCGA-CS-6669-01A	-1276.76	-1383.17
TCGA-HT-7694-01A	-1310.81	-1121.5
TCGA-DU-8167-01A	-359.514	422.475
TCGA-FG-8186-01A	-667.939	357.856
TCGA-DB-5270-01A	-378.016	-50.8977
TCGA-FG-A70Y-01A	-671.459	307.29
TCGA-HW-7487-01A	-1338.3	-981.924
TCGA-HT-7616-01A	-183.662	864.588
TCGA-QH-A65R-01A	-1211.04	-744.63
TCGA-HT-7686-01A	-243.309	1191.61
TCGA-HT-8012-01A	-1175.69	-627.097
TCGA-DU-6400-01A	-1367.47	-738.154
TCGA-DH-5141-01A	-967.343	-368.367
TCGA-HT-7873-01B	-899.19	-203.818
TCGA-HT-7608-01A	-758.029	-226.166
TCGA-FG-8188-01A	-742.331	-125.793
TCGA-HT-7606-01A	-1245.88	-535.886
TCGA-DU-6397-02A	-863.716	-456.165
TCGA-P5-A5F4-01A	-1235.64	-1014.31
TCGA-DU-7292-01A	-941.642	-810.568
TCGA-QH-A6X8-01A	-1228.21	-509.816
TCGA-S9-A6WG-01A	430.308	836.677
TCGA-E1-A7YE-01A	-72.3343	1008.71
TCGA-S9-A6U5-01A	-966.646	352.001
TCGA-W9-A837-01A	-1330.92	-1039.18
TCGA-F6-A8O4-01A	-1308.27	-905.693
TCGA-FG-A60J-01A	-770.576	-37.5365
TCGA-HT-7471-01A	-498.191	330.843
TCGA-CS-5396-01A	-758.618	-296.491
TCGA-FG-A713-01A	-1092.04	-1134.07
TCGA-DH-A669-02A	-963.978	-100.941
TCGA-WY-A85B-01A	-684.074	505.685
TCGA-HT-7691-01A	-63.9491	638
TCGA-DU-6410-01A	-1576.29	-1472.58
TCGA-TQ-A7RV-01A	-1234.2	-630.315
TCGA-HT-7604-01A	-1002.16	-520.641
TCGA-HW-A5KJ-01A	-1381.43	-771.513
TCGA-S9-A7QX-01A	-1062.85	139.721
TCGA-DU-8158-01A	-83.4745	854.904
TCGA-HT-7688-01A	-1247.01	-1019.21
TCGA-TM-A7C3-01A	-1025.51	-657.675
TCGA-HT-7472-01A	-454.207	458.05
TCGA-S9-A7R2-01A	-271.586	922.353
TCGA-VM-A8C8-01A	-847.164	42.1313
TCGA-QH-A6CY-01A	-1193.52	-772.607
TCGA-E1-A7YJ-01A	-715.537	655.777
TCGA-HT-8558-01A	-1214.51	-1264.5
TCGA-R8-A6MO-01A	-1111.24	-173.41
TCGA-CS-5394-01A	-1526.61	-1089.55
TCGA-P5-A780-01A	-605.544	-1.85839
TCGA-R8-A6MK-01A	-1232.17	-542.262
TCGA-HT-A5R5-01A	-414.375	540.186
TCGA-HT-A74L-01A	-1060.65	-211.124
TCGA-FN-7833-01A	-56.7978	1165.99
TCGA-DB-A64W-01A	-1711.21	-1667.55
TCGA-DU-7018-01A	-1318.45	-1096.04
TCGA-FG-8181-01A	-854.718	-911.603
TCGA-QH-A6CS-01A	-557.943	105.429
TCGA-VM-A8CH-01A	-754.598	254.814
TCGA-TQ-A8XE-01A	-1203.5	-317.98
TCGA-FG-5965-02B	-1553.88	-1634.27
TCGA-DU-6404-02B	-1125.69	-1481.61
TCGA-DB-A4XB-01A	-1240.58	-483.188
TCGA-HT-7620-01A	-1068.03	-269.758
TCGA-TM-A7C5-01A	-1317.85	-826.981
TCGA-HT-A615-01A	-749.9	437.095
TCGA-DB-5274-01A	-540.361	320.756
TCGA-WY-A85E-01A	-1387.06	-857.813
TCGA-FG-A87N-01A	-1225.21	-468.284
TCGA-TM-A84G-01A	-1590.97	-1200.41
TCGA-DU-6397-01A	-910.586	-325.239
TCGA-DH-A7UV-01A	-994.704	38.1722
TCGA-HT-7857-01A	984.48	2104.7
TCGA-S9-A6TU-01A	-652.459	364.188
TCGA-FG-A6IZ-01A	-1256.29	-257.441
TCGA-E1-5303-01A	-353.269	935.845
TCGA-DU-7302-01A	-1387.39	-1063.87
TCGA-HW-7491-01A	-1284.98	-802.983
TCGA-RY-A83X-01A	-1379.99	-883.487
TCGA-FG-5965-01B	-729.062	186.218
TCGA-FG-5962-01B	-1060.12	-770.03
TCGA-DU-A5TY-01A	45.1661	1253.88
TCGA-HW-7486-01A	-797.44	-176.113
TCGA-HT-7693-01A	-726.281	526.049
TCGA-DB-A75M-01A	-865.862	-25.4498
TCGA-DU-7301-01A	-335.366	426.633
TCGA-KT-A74X-01A	-1352.08	-416.529
TCGA-P5-A5EZ-01A	-711.841	278.425
TCGA-VM-A8CB-01A	-1558.21	-852.06
TCGA-CS-5393-01A	-801.396	315.83
TCGA-DB-A4XF-01A	-753.947	-158.216
TCGA-HT-A61B-01A	-301.605	1202.53
TCGA-DB-A64O-01A	-623.816	-152.377
TCGA-S9-A6WI-01A	-1056.5	-1138.23
TCGA-S9-A7QZ-01A	-1444.78	-1201.06
TCGA-VM-A8CD-01A	-482.611	412.694
TCGA-HT-7610-01A	-1081.97	-852.729
TCGA-CS-6290-01A	-278.244	1186.47
TCGA-P5-A5F1-01A	-617.28	128.999
TCGA-DU-7011-01A	156.009	750.261
TCGA-DU-A7T6-01A	-857.24	-725.192
TCGA-TM-A7CA-01A	-1283.52	-681.622
TCGA-HT-A5R7-01A	-1054.76	-636.877
TCGA-DU-6395-01A	-863.609	-41.6124
TCGA-HT-A74O-01A	-419.606	993.732
TCGA-FG-7637-01A	-1001.78	-689.762
TCGA-CS-5395-01A	-786.326	-609.726
TCGA-DU-7008-01A	-1371.15	-787.298
TCGA-TQ-A7RV-02A	-461.142	-13.4982
TCGA-DU-5847-01A	-243.424	886.428
TCGA-S9-A7R4-01A	-85.3113	278.918
TCGA-CS-4942-01A	-544.499	907.588
TCGA-HT-7677-01A	-1089.39	-697.071
TCGA-E1-5304-01A	-1733.16	-1203.95
TCGA-TQ-A7RN-01A	-1344.39	-801.13
TCGA-S9-A6WL-01A	-687.49	-785.255
TCGA-QH-A6CW-01A	-878.683	150.369
TCGA-FG-A87Q-01A	25.6262	915.122
TCGA-WY-A85C-01A	-1021.11	-173.56
TCGA-QH-A6X3-01A	-1002.06	-279.183
TCGA-S9-A6TV-01A	-13.9909	1090.15
TCGA-TM-A84C-01A	-335.491	360.271
TCGA-S9-A6WN-01A	-233.23	928.026
TCGA-FG-A4MX-01A	-1249.3	-277.698
TCGA-DB-A64U-01A	-1117.05	-693.002
TCGA-DU-7014-01A	-758.946	-114.611
TCGA-HT-7690-01A	-186.089	702.278
TCGA-QH-A6X5-01A	-1131.23	-538.636
TCGA-QH-A86X-01A	-1292.48	-708.868
TCGA-FG-A4MT-01A	-1203.13	-466.571
TCGA-DU-7015-01A	-599.937	695.587
TCGA-TQ-A7RH-01A	-673.385	334.447
TCGA-HT-A61A-01A	-1104.1	-980.042
TCGA-E1-5318-01A	-773.177	-517.625
TCGA-HT-7602-01A	-741.958	40.0173
TCGA-FG-A6J3-01A	-79.1934	1158.64
TCGA-HW-7489-01A	-1018.15	-610.994
TCGA-HT-8018-01A	204.531	482.069
TCGA-DB-5281-01A	-679	-472.001
TCGA-DB-A64L-01A	-1233.34	-271.781
TCGA-S9-A6WP-01A	-949.673	137.896
TCGA-E1-A7YU-01A	-1049.89	-378.788
TCGA-DU-A5TW-01A	-1231.05	-469.685
TCGA-S9-A6U8-01A	-710.359	244.908
TCGA-DU-8164-01A	-1377.29	-1114.62
TCGA-DU-8165-01A	85.0301	662.183
TCGA-P5-A5F6-01A	-612.227	-371.022
TCGA-HT-7875-01A	-1309.86	-1132.82
TCGA-E1-A7Z6-01A	-916.095	-210.141
TCGA-HT-7882-01A	1697.17	2016.73
TCGA-S9-A89Z-01A	-287.452	781.593
TCGA-DU-7300-01A	-780.545	-404.576
TCGA-S9-A7J1-01A	-968.382	-422.037
TCGA-S9-A7R8-01A	-813.616	230.771
TCGA-DB-A4XE-01A	-1184.62	-487.035
TCGA-FG-A6J1-01A	-855.45	53.2494
TCGA-DB-A64V-01A	-467.398	753.471
TCGA-DU-A6S3-01A	-1407.49	-1165.23
TCGA-DU-A7TB-01A	-1060.7	-697.89
TCGA-DU-6408-01A	-897.614	43.2684
TCGA-TQ-A7RK-01A	-1306.22	-637.302
TCGA-S9-A7J3-01A	-1140.27	-316.864
TCGA-S9-A6TZ-01A	-654.374	2.38403
TCGA-HT-7689-01A	-881.406	-69.4589
TCGA-HT-A74H-01A	-197.933	409.868
TCGA-S9-A6U1-01A	-919.354	-149.725
TCGA-TQ-A7RQ-01A	-1531.29	-1341.77
TCGA-E1-5305-01A	-838.309	-199.639
TCGA-VM-A8C9-01A	-68.5337	1286.13
TCGA-RY-A83Y-01A	-1159.57	-71.2759
TCGA-FG-8187-01A	-870.352	-348.967
TCGA-DB-A64X-01A	-1111.22	-470.207
TCGA-DB-A4XD-01A	-1090.63	-464.696
TCGA-HT-7611-01A	-625.463	110.159
TCGA-TM-A84L-01A	-536.314	330.387
TCGA-S9-A7R7-01A	299.893	1074.39
TCGA-DU-6401-01A	-484.56	-36.1579
TCGA-QH-A6X9-01A	-1135.95	-646.085
TCGA-DB-A4XC-01A	-878.58	133.569
TCGA-F6-A8O3-01A	-1568.54	-1141.36
TCGA-DB-5278-01A	-935.636	-664.284
TCGA-HT-8563-01A	712.614	2127.78
TCGA-FG-8185-01A	-1179.43	-437.053
TCGA-E1-A7YH-01A	-1074.13	-80.8453
TCGA-HW-A5KM-01A	46.5492	1829.86
TCGA-E1-A7YV-01A	-1353.24	-925.768
TCGA-HT-A4DS-01A	-716.728	785.981
TCGA-HT-7483-01A	-661.605	-499.163
TCGA-HT-7884-01B	-1237.39	-834.149
TCGA-CS-6667-01A	-874.028	-160.352
TCGA-DH-5143-01A	-665.932	-19.7268
TCGA-DB-A75O-01A	-744.569	560.206
TCGA-DU-5854-01A	-92.5808	576.975
TCGA-P5-A72Z-01A	-1514.87	-1037.77
TCGA-HW-A5KK-01A	-251.738	1031.86
TCGA-TQ-A7RI-01A	-1187.64	-386.808
TCGA-QH-A870-01A	-1219.13	-543.935
TCGA-RY-A843-01A	-1064.59	-407.862
TCGA-HT-7475-01A	-1434.37	-1020.31
TCGA-DU-A7TJ-01A	-645.636	140.755
TCGA-HW-7490-01A	-704.906	74.8639
TCGA-E1-5311-01A	-1260.53	-977.762
TCGA-DU-7299-01A	-973.348	6.22656
TCGA-E1-A7YS-01A	-1677.54	-999.697
TCGA-S9-A7J2-01A	-1344.3	-924.623
TCGA-E1-A7YI-01A	-1316.42	-507.945
TCGA-DU-A76K-01A	-1067.52	-1206.87
TCGA-HT-8019-01A	-1156.41	-1277.44
TCGA-HT-7468-01A	-1106.6	-572.741
TCGA-DH-5140-01A	-881.291	-573.235
TCGA-VW-A7QS-01A	-1300.55	-827.09
TCGA-S9-A6U9-01A	-231.974	700.383
TCGA-FG-7634-01A	-60.9224	426.967
TCGA-P5-A77X-01A	-1436.93	-1154.01
TCGA-HT-8010-01A	-820.222	-509.111
TCGA-S9-A6U2-01A	-789.063	-325.515
TCGA-HT-8113-01A	-1336.2	-1114.67
TCGA-S9-A6TS-01A	-929.828	-16.5563
TCGA-S9-A7R3-01A	-747.22	131.434
TCGA-E1-A7Z2-01A	-1143.78	-885.333
TCGA-DU-7309-01A	-725.107	-414.314
TCGA-HW-8320-01A	-841.643	-44.1287
TCGA-CS-6668-01A	-1674.36	-1088.9
TCGA-S9-A6U6-01A	-1045.24	-373.522
TCGA-FG-5965-02A	-649.615	222.987
TCGA-DU-6393-01A	-1518.7	-1028.3
TCGA-HT-A74J-01A	-1169.02	-228.962
TCGA-E1-A7YL-01A	-161.688	962.074
TCGA-QH-A6XC-01A	-811.885	-240.799
TCGA-HT-7609-01A	-838.789	140.956
TCGA-QH-A65X-01A	-906.817	-118.157
TCGA-P5-A731-01A	-486.955	-207.438
TCGA-HT-7695-01A	-1153.69	-1019.67
TCGA-FG-A4MW-01A	-846.296	-346.129
TCGA-E1-A7Z3-01A	-675.77	-144.666
TCGA-P5-A5F0-01A	-1673.48	-1335.85
TCGA-DH-A66F-01A	-1256.18	-709.597
TCGA-HT-8110-01A	-94.8124	1441.06
TCGA-VW-A8FI-01A	-818.332	360.375
TCGA-S9-A7R1-01A	-1283.42	-991.621
TCGA-DU-7019-01A	-426.207	29.8386
TCGA-QH-A65V-01A	-1049.83	-308.293
TCGA-DB-5280-01A	-847.225	-453.637
TCGA-FG-A60K-01A	-1272.99	-394.578
TCGA-HT-7479-01A	-360.861	345.991
TCGA-P5-A737-01A	-1197.54	-521.054
TCGA-IK-7675-01A	-1147	-791.774
TCGA-S9-A6WE-01A	-1118.87	-530.752
TCGA-QH-A6CU-01A	-732.172	86.7988
TCGA-P5-A781-01A	-1084.9	-641.929
TCGA-FG-A711-01A	-1364.01	-472.128
TCGA-HT-8108-01A	-796.793	541.633
TCGA-DU-A7TG-01A	-800.87	-468.148
TCGA-FG-A4MU-01B	-160.718	744.08
TCGA-TM-A84Q-01A	-602.393	489.522
TCGA-DU-6407-01A	-901.391	-323.797
TCGA-DU-7013-01A	-727.541	65.4576
TCGA-HT-8109-01A	-968.7	-523.837
TCGA-DU-6407-02B	-821.236	65.9168
TCGA-E1-A7YY-01A	-1001.71	-827.083
TCGA-DU-A6S6-01A	-1479	-1378.71
TCGA-HT-8013-01A	-469.019	1126.08
TCGA-CS-6670-01A	-1174.06	-922.459
TCGA-E1-5319-01A	-862.272	-278.682
TCGA-TQ-A7RK-02B	-912.107	-405.193
TCGA-TQ-A7RM-01A	-1359.39	-1193.6
TCGA-HT-7680-01A	-201.228	596.109
TCGA-HT-7902-01A	-1040.16	-397.12
TCGA-TQ-A7RO-01A	-1323.13	-738.104
TCGA-DU-A7TI-01A	-652.295	465.972
TCGA-HT-7607-01A	-852.511	-636.622
TCGA-P5-A5EW-01A	-779.619	-84.6348
TCGA-CS-4944-01A	-663.759	128.412
TCGA-TM-A7C4-01A	-1252.86	-1053.5
TCGA-DU-A5TS-01A	-1020.01	-187.532
TCGA-QH-A6X4-01A	-1551.07	-680.911
TCGA-P5-A5F2-01A	-1256.33	-890.92
TCGA-DU-7006-01A	-145.227	973.617
TCGA-HT-A617-01A	-109.075	732.663
TCGA-P5-A72W-01A	-1157.02	-283.323
TCGA-FG-7643-01A	-774.485	-643.154
TCGA-DU-5874-01A	-1402.54	-1052.22
TCGA-S9-A7QY-01A	-1336.54	-828.285
TCGA-DB-A4XH-01A	-1214.91	-1116.75
TCGA-VV-A86M-01A	-919.564	259.763
TCGA-HW-8321-01A	-774.57	-87.8143
TCGA-DB-A75L-01A	-931.335	-184.781
TCGA-HT-8564-01A	-692.437	-251.787
TCGA-DU-6404-02A	-698.815	227.017
TCGA-DU-A5TP-01A	-451.421	1264.98
TCGA-CS-6666-01A	-520.976	-70.3288
TCGA-DU-7012-01A	690.545	1645.65
TCGA-HT-A5R9-01A	-1179.16	-899.479
TCGA-E1-A7YK-01A	-194.386	1182.57
TCGA-HT-7856-01A	-1117.85	-986.617
TCGA-VM-A8CF-01A	-466.513	952.62
TCGA-HT-8111-01A	-694.203	415.749
TCGA-HT-7881-01A	-1375.72	-1203.91
TCGA-DU-7304-01A	-653.704	254.599
TCGA-DU-5853-01A	-583.459	550.493
TCGA-CS-4938-01B	-667.026	-108.827
TCGA-VM-A8CA-01A	-550.269	103.822
TCGA-S9-A6U0-01A	306.365	1160.39
TCGA-DU-6402-01A	-158.935	864.97
TCGA-DH-A7US-01A	-1199.11	-534.464
TCGA-TM-A84R-01A	-1204.9	-1215.93
TCGA-HT-7860-01A	-352.405	603.797
TCGA-P5-A730-01A	-1036.11	-668.088
TCGA-DU-A5TT-01A	-562.793	-87.5684
TCGA-R8-A6ML-01A	-1510.44	-911.55
TCGA-P5-A735-01A	-1259.22	-348.099
TCGA-DU-6404-01A	-654.119	-359.638
TCGA-HT-7854-01A	-231.361	683.484
TCGA-TM-A84I-01A	-1147.11	-292.825
TCGA-HT-7481-01A	-1139.41	-876.173
TCGA-P5-A733-01A	-1067.09	-617.167
TCGA-DU-A7TC-01A	-1283.9	-722.066
TCGA-DU-8166-01A	-834.571	-105.568
TCGA-E1-5322-01A	-660.819	573.666
TCGA-DU-A76R-01A	-802.341	-695.697
TCGA-DB-5277-01A	-1029.85	-734.821
TCGA-HT-7877-01A	-1192.46	-824.094
TCGA-HT-7684-01A	-592.941	396.786
TCGA-S9-A6UB-01A	-1565.77	-1108.24
TCGA-S9-A6TY-01A	-1644.02	-1336.63
TCGA-HT-8107-01A	-986.741	-1078.51
TCGA-HT-7470-01A	-851.277	-521.253
TCGA-HT-7601-01A	118.409	1323.97
TCGA-FG-5964-01A	-784.292	371.3
TCGA-DU-A76O-01A	-782.842	736.786
TCGA-P5-A5EY-01A	-765.305	-307.895
TCGA-DU-7298-01A	-974.992	-117.139
TCGA-WY-A85D-01A	-975.826	36.6129
TCGA-EZ-7264-01A	-1438.99	-1102.15
TCGA-DB-A75P-01A	-634.424	-245.748
TCGA-QH-A65Z-01A	-1344.09	-786.08
TCGA-QH-A6XA-01A	-897.379	-226.19
TCGA-DH-A66B-01A	-523.818	753.472
TCGA-S9-A7IX-01A	-241.932	465.111
TCGA-DB-5279-01A	-992.136	-410.424
TCGA-HT-A5RB-01A	-1229.55	-1027.48
TCGA-FG-7641-01B	-1538.67	-1352.33
TCGA-DB-A4X9-01A	-1241.28	-463.844
TCGA-FG-7638-01B	-1057	-638.982
TCGA-DU-6399-01A	-521.269	298.007
TCGA-DU-8163-01A	-540.89	504.721
TCGA-P5-A77W-01A	-1462.4	-988.157
TCGA-S9-A6WM-01A	-504.401	-288.254
TCGA-DU-A76L-01A	353.089	756.623
TCGA-HT-A614-01A	-1087.79	-287.935
TCGA-CS-6186-01A	-991.28	-287.19
TCGA-QH-A65S-01A	-855.395	117.985
TCGA-HT-7478-01A	-4.05641	1389.71
TCGA-HT-A61C-01A	-573.645	303.072
TCGA-HT-A5RA-01A	-415.971	190.018
TCGA-TQ-A7RK-02A	-901.795	-64.114
TCGA-DU-7290-01A	14.0634	1168.1
TCGA-WY-A859-01A	-1353.71	-1186.23
TCGA-HT-7482-01A	-465.954	363.15
TCGA-HT-8015-01B	-566.614	-99.6634
TCGA-P5-A736-01A	-222.829	906.735
TCGA-DB-5275-01A	-1133.46	-310.718
TCGA-P5-A5EX-01A	31.8123	1174.04
TCGA-S9-A7IZ-01A	-762.591	48.334
TCGA-DU-7306-01A	-654.958	-19.6172
TCGA-RY-A83Z-01A	-1403.22	-30.2134
TCGA-DB-A4XG-01A	-1630.36	-1359.45
TCGA-S9-A89V-01A	-710.396	-9.94128
TCGA-TM-A84O-01A	-943.146	-323.067
TCGA-TM-A84B-01A	-858.465	-772.191
TCGA-DU-7304-02A	-1603.77	-859.12
TCGA-DU-6396-01A	-4.06798	1484.36
TCGA-DU-5852-01A	-250.57	400.955
TCGA-FG-A4MT-02A	-941.794	-444.805
TCGA-HT-8011-01A	-1083.21	-474.999
TCGA-DH-5144-01A	-1321.22	-680.138
TCGA-HT-7855-01A	-1087.74	-300.062
TCGA-FG-6690-01A	-733.947	255.952
TCGA-HT-7879-01A	-732.687	-94.2369
TCGA-FG-8191-01A	-611.124	216.262
TCGA-HT-7603-01A	-1235.18	-933.412
TCGA-DH-5142-01A	-256.417	1143.89
TCGA-QH-A6CX-01A	-507.357	370.165
TCGA-FG-8189-01B	-1340.32	-1435.14
TCGA-E1-A7YN-01A	445.744	1978.89
TCGA-CS-6188-01A	-383.35	334.428
TCGA-HT-A74K-01A	-536.899	10.2602
TCGA-FG-7636-01A	-1141.87	-308.58
TCGA-DU-5872-01A	-454.272	379.193
TCGA-HT-7480-01A	-1239.73	-942.856
TCGA-FG-A70Z-01A	6.60292	473.117
TCGA-IK-8125-01A	-1027.47	-572.446
TCGA-FG-5963-01A	-123.992	1118.64
TCGA-TQ-A7RP-01A	-488.244	-126.893
TCGA-HT-7880-01A	-1003.53	-627.928
TCGA-DH-A7UR-01A	-1101.75	-985.731
TCGA-S9-A6UA-01A	453.768	1484.56
TCGA-S9-A6TW-01A	-757.164	-373.296
TCGA-HT-A5RC-01A	-577.03	198.13
TCGA-HT-A616-01A	-1048.21	-834.162
TCGA-DU-A5TR-01A	-110.208	1653.63
TCGA-FG-5963-02A	-299.098	-678.832
TCGA-HT-7477-01B	-940.112	-453.904
TCGA-FG-6689-01A	-782.664	176.338
TCGA-DB-5273-01A	-206.876	533.211
TCGA-VV-A829-01A	-906.726	-25.7704
TCGA-DH-A66G-01A	-388.987	132.661
TCGA-FG-6692-01A	-660.668	340.928
TCGA-TQ-A7RJ-01A	-917.205	113.088
TCGA-S9-A7J0-01A	-1526.53	-736.89
