# Supplementary material for: Ubiquitin-proteasome system-mediated ubiquitination modification patterns and characterization of tumor microenvironment infiltration, stemness and cellular senescence in low-grade glioma
Source: Aging (Albany NY). 2023 Apr 11;15(8):2970–98. doi: 10.18632/aging.204650 (PMC10188348; doi:10.18632/aging.204650)
Supplement: Supplementary Table 6 [file aging-15-204650-s006.xlsx]

## Sheet: Sheet1
Supplementary Table 6. TIDE score, MSI score, dysfunction score, exclusion score for each sample.
id	TIDE	MSI Expr Sig	Dysfunction	Exclusion
TCGA-CS-6290-01A	-2.3	0.47	1.04	-2.3
TCGA-HW-A5KM-01A	-2.22	0.4	0.66	-2.22
TCGA-FN-7833-01A	-1.75	0.64	0.48	-1.75
TCGA-CS-5393-01A	-1.69	0.34	0.65	-1.69
TCGA-WY-A858-01A	-1.66	0.13	1.22	-1.66
TCGA-S9-A6U9-01A	-1.65	0.26	1.07	-1.65
TCGA-HT-A615-01A	-1.63	0.71	0.25	-1.63
TCGA-HT-8108-01A	-1.61	0.38	-0.01	-1.61
TCGA-P5-A5EZ-01A	-1.48	0.14	0.46	-1.48
TCGA-TQ-A7RH-01A	-1.48	0.29	1.06	-1.48
TCGA-S9-A6TU-01A	-1.47	0.18	1.28	-1.47
TCGA-DU-A7TI-01A	-1.47	0.65	0.85	-1.47
TCGA-CS-4942-01A	-1.45	0.62	0.54	-1.45
TCGA-DU-8167-01A	-1.44	0.5	0.48	-1.44
TCGA-HT-8013-01A	-1.4	0.41	0.42	-1.4
TCGA-HW-A5KL-01A	-1.37	0.2	0.28	-1.37
TCGA-HT-7479-01A	-1.36	0.59	0.15	-1.36
TCGA-S9-A6WO-01A	-1.34	0.46	-0.12	-1.34
TCGA-FG-8182-01A	-1.33	0.49	-0.15	-1.33
TCGA-VM-A8CF-01A	-1.33	0.48	0.89	-1.33
TCGA-HT-7620-01A	-1.32	0.54	-0.04	-1.32
TCGA-DU-8163-01A	-1.32	0.35	0.48	-1.32
TCGA-E1-5303-01A	-1.29	0.52	0.36	-1.29
TCGA-HW-A5KK-01A	-1.29	0.33	1.2	-1.29
TCGA-HT-7854-01A	-1.29	0.7	0.51	-1.29
TCGA-RY-A847-01A	-1.28	0.55	1.09	-1.28
TCGA-S9-A7R2-01A	-1.27	0.45	1.05	-1.27
TCGA-E1-A7YK-01A	-1.27	0.36	1.09	-1.27
TCGA-E1-A7Z4-01A	-1.25	0.47	0.24	-1.25
TCGA-FG-6689-01A	-1.25	0.59	0.94	-1.25
TCGA-FG-6691-01A	-1.24	0.41	-0.03	-1.24
TCGA-DU-A76O-01A	-1.24	0.37	1.35	-1.24
TCGA-FG-6690-01A	-1.24	0.41	0.19	-1.24
TCGA-DH-A7UV-01A	-1.23	0.36	0.43	-1.23
TCGA-S9-A6WQ-01A	-1.22	0.48	1.12	-1.22
TCGA-S9-A6U8-01A	-1.21	0.44	0.49	-1.21
TCGA-DB-A64L-01A	-1.2	0.76	0.41	-1.2
TCGA-FG-5964-01A	-1.19	0.42	1.71	-1.19
TCGA-DU-7015-01A	-1.17	0.4	-0.25	-1.17
TCGA-HT-7602-01A	-1.17	0.56	0.1	-1.17
TCGA-TM-A84L-01A	-1.16	0.45	1.07	-1.16
TCGA-FG-8186-01A	-1.14	0.73	0.56	-1.14
TCGA-FG-8187-01A	-1.14	0.62	0.15	-1.14
TCGA-DU-7011-01A	-1.1	0.27	0.82	-1.1
TCGA-DU-5871-01A	-1.08	0.53	0.3	-1.08
TCGA-S9-A7R3-01A	-1.08	0.53	0.13	-1.08
TCGA-DU-A5TS-01A	-1.08	0.36	0.71	-1.08
TCGA-DB-A64S-01A	-1.05	0.51	0.05	-1.05
TCGA-DB-A75O-01A	-1.05	0.28	1.62	-1.05
TCGA-DU-7299-01A	-1.05	0.41	-0.35	-1.05
TCGA-TQ-A7RJ-01A	-1.03	0.5	0.69	-1.03
TCGA-TQ-A7RR-01A	-1.01	0.44	0.64	-1.01
TCGA-HT-7686-01A	-1.01	0.56	0.51	-1.01
TCGA-FG-A70Y-01A	-0.99	0.51	0.64	-0.99
TCGA-FG-A87Q-01A	-0.99	0.58	0.97	-0.99
TCGA-S9-A7J3-01A	-0.99	0.61	0.45	-0.99
TCGA-WH-A86K-01A	-0.98	0.22	0.27	-0.98
TCGA-WY-A85D-01A	-0.97	0.52	-0.08	-0.97
TCGA-WY-A85B-01A	-0.96	0.36	-0.25	-0.96
TCGA-S9-A7R4-01A	-0.95	0.21	0.36	-0.95
TCGA-HT-7609-01A	-0.95	0.45	-0.29	-0.95
TCGA-DB-A4XC-01A	-0.94	0.56	0.81	-0.94
TCGA-HW-7486-01A	-0.93	0.57	0.23	-0.93
TCGA-QH-A6CU-01A	-0.93	0.68	0.51	-0.93
TCGA-FG-A4MX-01A	-0.92	0.1	0.5	-0.92
TCGA-DU-A6S7-01A	-0.89	0.36	0.49	-0.89
TCGA-TQ-A7RW-01A	-0.87	0.41	0.04	-0.87
TCGA-FG-8191-01A	-0.87	0.68	-0.48	-0.87
TCGA-DH-A66D-01A	-0.86	0.37	0.59	-0.86
TCGA-HT-7684-01A	-0.86	0.6	0.56	-0.86
TCGA-QH-A65S-01A	-0.85	0.41	0.28	-0.85
TCGA-HT-8109-01A	-0.84	0.69	0.39	-0.84
TCGA-HT-8010-01A	-0.83	0.59	1.12	-0.83
TCGA-FG-A710-01A	-0.82	0.6	1.36	-0.82
TCGA-S9-A7QX-01A	-0.8	0.32	-0.18	-0.8
TCGA-DB-A4XH-01A	-0.78	0.37	0.3	-0.78
TCGA-FG-A60L-01A	-0.76	0.67	0.96	-0.76
TCGA-P5-A780-01A	-0.76	0.2	0.33	-0.76
TCGA-VM-A8CH-01A	-0.76	0.4	-0.11	-0.76
TCGA-HT-A74H-01A	-0.76	0.37	1.03	-0.76
TCGA-WY-A85A-01A	-0.75	0.41	0.07	-0.75
TCGA-HT-A61B-01A	-0.75	0.51	0.2	-0.75
TCGA-HT-7482-01A	-0.75	0.66	-0.59	-0.75
TCGA-HW-8321-01A	-0.73	0.5	0.21	-0.73
TCGA-HT-7880-01A	-0.72	0.57	1.33	-0.72
TCGA-DU-A7TG-01A	-0.71	0.73	1.09	-0.71
TCGA-P5-A733-01A	-0.71	0.47	-0.13	-0.71
TCGA-S9-A6TZ-01A	-0.7	0.54	-0.04	-0.7
TCGA-WY-A85C-01A	-0.69	0.27	0	-0.69
TCGA-CS-6667-01A	-0.69	0.44	-0.16	-0.69
TCGA-QH-A6XA-01A	-0.69	0.53	-0.17	-0.69
TCGA-FG-6688-01A	-0.68	0.53	0.58	-0.68
TCGA-HT-7608-01A	-0.68	0.6	0.33	-0.68
TCGA-RY-A843-01A	-0.68	0.57	0.46	-0.68
TCGA-DB-A75K-01A	-0.67	0.43	1.73	-0.67
TCGA-E1-A7YD-01A	-0.67	0.34	-0.67	0.77
TCGA-CS-6669-01A	-0.67	0.62	0.83	-0.67
TCGA-E1-A7YH-01A	-0.66	0.58	0.17	-0.66
TCGA-DH-A7UT-01A	-0.65	0.36	0.84	-0.65
TCGA-QH-A6CW-01A	-0.63	0.31	0.6	-0.63
TCGA-DU-7306-01A	-0.63	0.57	-0.29	-0.63
TCGA-HT-7485-01A	-0.62	0.63	-0.52	-0.62
TCGA-P5-A5EW-01A	-0.62	0.6	-0.31	-0.62
TCGA-DU-8166-01A	-0.62	0.62	-0.19	-0.62
TCGA-FG-8188-01A	-0.61	0.49	-0.4	-0.61
TCGA-DU-6395-01A	-0.61	0.45	0.58	-0.61
TCGA-DU-5855-01A	-0.6	0.45	0.55	-0.6
TCGA-S9-A7R8-01A	-0.6	0.32	-0.17	-0.6
TCGA-HW-7490-01A	-0.6	0.55	-0.05	-0.6
TCGA-S9-A7IZ-01A	-0.6	0.44	1.02	-0.6
TCGA-DU-A6S2-01A	-0.59	0.58	0.9	-0.59
TCGA-DH-5140-01A	-0.59	0.37	-0.59	1.81
TCGA-TM-A84B-01A	-0.59	0.64	-0.59	0.92
TCGA-DH-5143-01A	-0.58	0.61	0.69	-0.58
TCGA-TM-A84T-01A	-0.56	0.34	-0.25	-0.56
TCGA-E1-A7Z6-01A	-0.56	0.63	0.06	-0.56
TCGA-KT-A7W1-01A	-0.55	0.45	-0.55	1.28
TCGA-QH-A6CS-01A	-0.55	0.65	0.35	-0.55
TCGA-E1-5307-01A	-0.54	0.67	-0.27	-0.54
TCGA-QH-A6X8-01A	-0.54	0.51	0.63	-0.54
TCGA-S9-A7J1-01A	-0.54	0.51	0.09	-0.54
TCGA-HT-A74J-01A	-0.54	0.39	1.27	-0.54
TCGA-HT-8019-01A	-0.53	0.64	1.08	-0.53
TCGA-QH-A6CY-01A	-0.52	0.77	0.31	-0.52
TCGA-S9-A6U6-01A	-0.52	0.67	0.58	-0.52
TCGA-S9-A6WI-01A	-0.51	0.79	0.99	-0.51
TCGA-HT-7611-01A	-0.51	0.5	-0.3	-0.51
TCGA-VM-A8C8-01A	-0.5	0.75	0.01	-0.5
TCGA-HT-7693-01A	-0.5	0.58	-0.64	-0.5
TCGA-DU-5849-01A	-0.49	0.62	0.82	-0.49
TCGA-DU-6401-01A	-0.49	0.2	0.08	-0.49
TCGA-DU-7013-01A	-0.49	0.31	-0.49	0.94
TCGA-E1-5322-01A	-0.49	0.49	-0.21	-0.49
TCGA-P5-A5EY-01A	-0.49	0.53	0.95	-0.49
TCGA-HT-7605-01A	-0.48	0.74	0.49	-0.48
TCGA-FG-8181-01A	-0.48	0.74	0.96	-0.48
TCGA-DU-8165-01A	-0.48	0.39	-0.48	0.33
TCGA-QH-A6X9-01A	-0.48	0.53	-0.15	-0.48
TCGA-HT-8113-01A	-0.48	0.82	0.79	-0.48
TCGA-TM-A84Q-01A	-0.48	0.58	-0.23	-0.48
TCGA-FG-A60J-01A	-0.47	0.64	0.63	-0.47
TCGA-S9-A7QY-01A	-0.47	0.45	0.67	-0.47
TCGA-HT-A5RA-01A	-0.47	0.65	-0.47	1.29
TCGA-E1-5302-01A	-0.46	0.62	0.49	-0.46
TCGA-HT-7692-01A	-0.46	0.31	-0.14	-0.46
TCGA-RY-A83Y-01A	-0.46	0.66	0.59	-0.46
TCGA-S9-A6TS-01A	-0.46	0.36	0.83	-0.46
TCGA-P5-A737-01A	-0.46	0.34	0.63	-0.46
TCGA-P5-A781-01A	-0.46	0.58	-0.02	-0.46
TCGA-QH-A6X4-01A	-0.46	0.4	0.42	-0.46
TCGA-VV-A86M-01A	-0.46	0.37	-0.89	-0.46
TCGA-HW-7487-01A	-0.45	0.81	0.26	-0.45
TCGA-E1-A7YY-01A	-0.45	0.77	1.03	-0.45
TCGA-QH-A6CX-01A	-0.45	0.38	0.78	-0.45
TCGA-DU-7007-01A	-0.44	0.35	-0.44	0.39
TCGA-QH-A6X3-01A	-0.44	0.56	-1.1	-0.44
TCGA-DU-7309-01A	-0.44	0.47	0.95	-0.44
TCGA-S9-A6WM-01A	-0.44	0.42	-0.44	1.45
TCGA-HT-8012-01A	-0.43	0.52	0.4	-0.43
TCGA-QH-A870-01A	-0.43	0.71	-0.62	-0.43
TCGA-HT-7856-01A	-0.43	0.65	1.08	-0.43
TCGA-HT-8558-01A	-0.42	0.83	0.64	-0.42
TCGA-HT-A74L-01A	-0.42	0.53	-0.48	-0.42
TCGA-HW-8320-01A	-0.42	0.51	-0.29	-0.42
TCGA-CS-4938-01B	-0.42	0.42	-0.33	-0.42
TCGA-DU-A5TU-01A	-0.41	0.45	0.92	-0.41
TCGA-HT-7610-01A	-0.41	0.63	0.35	-0.41
TCGA-HT-7470-01A	-0.41	0.5	0.54	-0.41
TCGA-HT-7474-01A	-0.4	0.66	0.64	-0.4
TCGA-DB-A75M-01A	-0.4	0.38	0.59	-0.4
TCGA-HT-A61A-01A	-0.4	0.74	0.85	-0.4
TCGA-HT-7689-01A	-0.4	0.69	-0.53	-0.4
TCGA-E1-A7Z3-01A	-0.4	0.44	1.53	-0.4
TCGA-QH-A65V-01A	-0.4	0.79	0.08	-0.4
TCGA-HT-7607-01A	-0.38	0.75	0.74	-0.38
TCGA-P5-A5F2-01A	-0.38	0.65	0.39	-0.38
TCGA-HT-7855-01A	-0.38	0.42	-0.57	-0.38
TCGA-HT-8105-01A	-0.37	0.73	-0.1	-0.37
TCGA-HT-A5R7-01A	-0.37	0.77	1	-0.37
TCGA-DB-5270-01A	-0.36	0.66	1.24	-0.36
TCGA-DB-A75L-01A	-0.36	0.51	0.33	-0.36
TCGA-TQ-A7RI-01A	-0.35	0.46	0.23	-0.35
TCGA-HT-7874-01A	-0.34	0.78	0.58	-0.34
TCGA-DU-8162-01A	-0.33	0.64	0.58	-0.33
TCGA-QH-A6X5-01A	-0.33	0.61	0.27	-0.33
TCGA-DH-5141-01A	-0.32	0.63	0.21	-0.32
TCGA-S9-A6TV-01A	-0.32	0.61	0.3	-0.32
TCGA-HT-7884-01B	-0.32	0.43	0.01	-0.32
TCGA-FG-A711-01A	-0.32	0.73	0.34	-0.32
TCGA-DU-7006-01A	-0.32	0.33	-0.32	0.97
TCGA-TM-A84H-01A	-0.31	0.4	-0.13	-0.31
TCGA-DH-A7UU-01A	-0.31	0.3	-0.26	-0.31
TCGA-TQ-A7RG-01A	-0.31	0.63	-0.16	-0.31
TCGA-TM-A7CA-01A	-0.31	0.4	0.06	-0.31
TCGA-HT-7879-01A	-0.31	0.3	0.24	-0.31
TCGA-P5-A5F6-01A	-0.29	0.68	0.03	-0.29
TCGA-E1-A7YW-01A	-0.28	0.52	-0.12	-0.28
TCGA-HT-7694-01A	-0.28	0.82	0.45	-0.28
TCGA-FG-8189-01B	-0.27	0.83	0.73	-0.27
TCGA-S9-A6WH-01A	-0.23	0.71	-0.09	-0.23
TCGA-DU-6400-01A	-0.23	0.62	0.34	-0.23
TCGA-HW-7489-01A	-0.23	0.74	0.92	-0.23
TCGA-FG-A4MY-01A	-0.22	0.41	0.26	-0.22
TCGA-HT-7481-01A	-0.22	0.66	-0.13	-0.22
TCGA-FG-A713-01A	-0.21	0.62	1.16	-0.21
TCGA-HW-A5KJ-01A	-0.21	0.27	0.32	-0.21
TCGA-DU-A7TB-01A	-0.21	0.41	0.02	-0.21
TCGA-HT-A614-01A	-0.2	0.58	0.09	-0.2
TCGA-QH-A6CZ-01A	-0.19	0.69	-0.19	-0.19
TCGA-P5-A72X-01A	-0.19	0.23	1.14	-0.19
TCGA-HT-7881-01A	-0.19	0.75	0.43	-0.19
TCGA-HW-8319-01A	-0.18	0.52	0.05	-0.18
TCGA-E1-5319-01A	-0.18	0.62	-0.18	-0.18
TCGA-RY-A845-01A	-0.17	0.61	0.01	-0.17
TCGA-FG-5962-01B	-0.17	0.69	0.63	-0.17
TCGA-S9-A6U1-01A	-0.17	0.5	-0.45	-0.17
TCGA-E1-A7YM-01A	-0.16	0.59	0.19	-0.16
TCGA-DU-6403-01A	-0.15	0.34	0.57	-0.15
TCGA-HT-7873-01B	-0.15	0.5	-0.67	-0.15
TCGA-DU-A7TA-01A	-0.14	0.31	0.03	-0.14
TCGA-TM-A84S-01A	-0.14	0.63	0.01	-0.14
TCGA-QH-A65Z-01A	-0.14	0.74	-0.16	-0.14
TCGA-DB-A4X9-01A	-0.14	0.59	0.11	-0.14
TCGA-CS-6670-01A	-0.13	0.56	0.44	-0.13
TCGA-P5-A735-01A	-0.13	0.47	0.37	-0.13
TCGA-E1-A7YE-01A	-0.12	0.36	0.34	-0.12
TCGA-HT-7688-01A	-0.12	0.82	0.22	-0.12
TCGA-VW-A8FI-01A	-0.12	0.24	0.23	-0.12
TCGA-TM-A7C4-01A	-0.12	0.5	0.36	-0.12
TCGA-DH-A66B-01A	-0.12	0.46	-0.12	-0.3
TCGA-CS-6186-01A	-0.12	0.44	-0.43	-0.12
TCGA-DU-6408-01A	-0.11	0.55	0.2	-0.11
TCGA-S9-A7R7-01A	-0.11	0.22	0.37	-0.11
TCGA-TQ-A7RO-01A	-0.11	0.58	-0.11	0.08
TCGA-TM-A84R-01A	-0.11	0.81	0.69	-0.11
TCGA-FG-7636-01A	-0.11	0.47	0.1	-0.11
TCGA-DU-7301-01A	-0.1	0.6	-0.64	-0.1
TCGA-P5-A77X-01A	-0.1	0.58	-0.12	-0.1
TCGA-DH-A66F-01A	-0.1	0.75	-0.59	-0.1
TCGA-DU-A7TC-01A	-0.1	0.76	0.79	-0.1
TCGA-IK-8125-01A	-0.1	0.57	0.05	-0.1
TCGA-HT-A616-01A	-0.1	0.75	0.36	-0.1
TCGA-DB-A4XF-01A	-0.09	0.38	0.2	-0.09
TCGA-DU-7014-01A	-0.09	0.36	-0.26	-0.09
TCGA-S9-A7R1-01A	-0.09	0.59	0	-0.09
TCGA-S9-A6WD-01A	-0.08	0.65	-0.38	-0.08
TCGA-TM-A7C5-01A	-0.08	0.36	-0.51	-0.08
TCGA-CS-4944-01A	-0.08	0.69	0.2	-0.08
TCGA-FG-7641-01B	-0.07	0.77	-0.17	-0.07
TCGA-W9-A837-01A	-0.06	0.74	0.08	-0.06
TCGA-DB-5279-01A	-0.06	0.71	-0.06	-0.32
TCGA-DU-A6S3-01A	-0.05	0.32	0.98	-0.05
TCGA-P5-A72W-01A	-0.05	0.57	0.18	-0.05
TCGA-R8-A6MK-01A	-0.04	0.66	-0.58	-0.04
TCGA-TQ-A7RF-01A	-0.03	0.71	-0.38	-0.03
TCGA-DB-A75P-01A	-0.03	0.32	1.67	-0.03
TCGA-P5-A77W-01A	-0.03	0.28	-0.76	-0.03
TCGA-VM-A8CD-01A	-0.02	0.73	0.42	-0.02
TCGA-S9-A6U2-01A	-0.02	0.58	-0.21	-0.02
TCGA-DH-A7US-01A	-0.02	0.63	0.2	-0.02
TCGA-E1-A7YJ-01A	-0.01	0.29	0.21	-0.01
TCGA-DB-A64U-01A	-0.01	0.71	-0.58	-0.01
TCGA-DU-A5TT-01A	-0.01	0.37	0.36	-0.01
TCGA-HT-7603-01A	-0.01	0.94	-0.17	-0.01
TCGA-DU-6399-01A	0	0.39	-0.04	0
TCGA-FG-6692-01A	0	0.19	0	0.68
TCGA-HT-7858-01A	0.01	0.46	0.01	-1.47
TCGA-S9-A7IQ-01A	0.01	0.82	0.87	0.01
TCGA-DB-A64O-01A	0.01	0.7	0.49	0.01
TCGA-FG-A60K-01A	0.01	0.72	-0.7	0.01
TCGA-DB-A64X-01A	0.02	0.59	0.27	0.02
TCGA-DU-7290-01A	0.02	0.65	0.02	-0.6
TCGA-HT-7695-01A	0.03	0.77	0.16	0.03
TCGA-VM-A8CE-01A	0.04	0.56	0.28	0.04
TCGA-DH-5142-01A	0.04	0.53	0.04	-0.31
TCGA-HW-8322-01A	0.05	0.56	-0.63	0.05
TCGA-KT-A74X-01A	0.05	0.54	-0.13	0.05
TCGA-S9-A6TX-01A	0.06	0.47	0.7	0.06
TCGA-P5-A5F1-01A	0.06	0.82	0.06	-0.37
TCGA-WY-A859-01A	0.06	0.69	0.67	0.06
TCGA-S9-A6TW-01A	0.06	0.23	0.4	0.06
TCGA-DU-5847-01A	0.07	0.72	0.07	0.08
TCGA-FG-A6J1-01A	0.08	0.69	0.88	0.08
TCGA-HT-7475-01A	0.08	0.61	0.04	0.08
TCGA-DU-7298-01A	0.08	0.77	-0.72	0.08
TCGA-P5-A5F0-01A	0.09	0.61	0.46	0.09
TCGA-DH-5144-01A	0.09	0.67	-1.01	0.09
TCGA-DB-A4XD-01A	0.11	0.56	-0.91	0.11
TCGA-DB-5275-01A	0.11	0.53	-0.04	0.11
TCGA-DB-5273-01A	0.11	0.47	0.06	0.11
TCGA-S9-A6WE-01A	0.13	0.66	-0.55	0.13
TCGA-CS-6668-01A	0.14	0.66	-0.85	0.14
TCGA-S9-A6TY-01A	0.15	0.68	-0.34	0.15
TCGA-FG-7638-01B	0.15	0.56	0.22	0.15
TCGA-HW-7495-01A	0.16	0.75	0.18	0.16
TCGA-DB-5274-01A	0.16	0.65	0.16	0.12
TCGA-S9-A89Z-01A	0.16	0.39	0.16	0.2
TCGA-DU-A76L-01A	0.16	0.29	0.16	1.07
TCGA-DU-A7TD-01A	0.17	0.25	0.17	-0.19
TCGA-DU-7009-01A	0.17	0.62	-0.72	0.17
TCGA-QH-A65R-01A	0.17	0.59	-0.14	0.17
TCGA-HT-7677-01A	0.17	0.62	-0.56	0.17
TCGA-DU-A5TW-01A	0.17	0.44	-0.85	0.17
TCGA-HT-7480-01A	0.17	0.48	0.04	0.17
TCGA-TQ-A7RQ-01A	0.18	0.69	0	0.18
TCGA-HW-7493-01A	0.19	0.66	0.19	-0.51
TCGA-RY-A83X-01A	0.2	0.6	-0.54	0.2
TCGA-DB-A64P-01A	0.21	0.59	-0.39	0.21
TCGA-R8-A6MO-01A	0.21	0.57	0.21	-0.46
TCGA-QH-A86X-01A	0.22	0.67	0.08	0.22
TCGA-S9-A7QZ-01A	0.23	0.52	0.46	0.23
TCGA-DB-5278-01A	0.23	0.7	0.24	0.23
TCGA-DB-5280-01A	0.23	0.4	-0.53	0.23
TCGA-E1-A7YS-01A	0.24	0.64	-0.85	0.24
TCGA-S9-A89V-01A	0.24	0.57	0.3	0.24
TCGA-DU-A5TY-01A	0.25	0.25	0.25	-0.55
TCGA-HT-A61C-01A	0.25	0.32	0.25	1.18
TCGA-VV-A829-01A	0.25	0.59	-0.58	0.25
TCGA-FG-A6IZ-01A	0.26	0.81	0.24	0.26
TCGA-DU-A6S6-01A	0.26	0.54	1.14	0.26
TCGA-DU-6402-01A	0.26	0.32	0.26	1.08
TCGA-DB-A64Q-01A	0.27	0.86	-1.13	0.27
TCGA-E1-A7YO-01A	0.27	0.55	0.21	0.27
TCGA-DB-A4XB-01A	0.27	0.69	-0.21	0.27
TCGA-DU-A6S8-01A	0.29	0.4	-0.28	0.29
TCGA-DU-7302-01A	0.29	0.77	-0.31	0.29
TCGA-DU-A76R-01A	0.29	0.62	0.2	0.29
TCGA-TM-A84O-01A	0.29	0.52	0.3	0.29
TCGA-WY-A85E-01A	0.3	0.45	-0.35	0.3
TCGA-E1-5305-01A	0.3	0.67	-0.48	0.3
TCGA-HW-7491-01A	0.32	0.45	-0.78	0.32
TCGA-EZ-7264-01A	0.32	0.59	-1.03	0.32
TCGA-HT-8114-01A	0.33	0.53	0.33	-0.51
TCGA-HT-7473-01A	0.33	0.35	0.33	-2.05
TCGA-FG-8185-01A	0.33	0.46	-0.71	0.33
TCGA-E1-A7YQ-01A	0.35	0.38	0.35	0.07
TCGA-DU-A5TP-01A	0.35	0.53	0.35	-0.99
TCGA-QH-A6CV-01A	0.36	0.34	0.15	0.36
TCGA-DU-8164-01A	0.37	0.69	-0.64	0.37
TCGA-RY-A83Z-01A	0.37	0.59	-0.07	0.37
TCGA-DB-A64R-01A	0.38	0.69	-0.46	0.38
TCGA-DU-7008-01A	0.38	0.61	-0.34	0.38
TCGA-HT-7902-01A	0.38	0.47	0.38	-0.62
TCGA-QH-A6XC-01A	0.4	0.49	1.15	0.4
TCGA-DU-7294-01A	0.41	0.63	-1.08	0.41
TCGA-R8-A6ML-01A	0.41	0.64	-0.63	0.41
TCGA-HT-A619-01A	0.43	0.43	-0.94	0.43
TCGA-R8-A73M-01A	0.43	0.73	0.09	0.43
TCGA-DU-5853-01A	0.44	0.47	0.44	-1.57
TCGA-E1-A7YL-01A	0.45	0.43	0.45	0.44
TCGA-P5-A5EX-01A	0.45	0.51	0.45	-0.36
TCGA-DH-A7UR-01A	0.45	0.39	0.12	0.45
TCGA-E1-A7Z2-01A	0.46	0.45	0.59	0.46
TCGA-S9-A6UB-01A	0.46	0.74	-0.71	0.46
TCGA-HT-A74K-01A	0.46	0.35	1.07	0.46
TCGA-TQ-A7RN-01A	0.47	0.53	-0.4	0.47
TCGA-DU-5852-01A	0.47	0.32	0.47	0.89
TCGA-DB-A4XE-01A	0.49	0.57	-0.33	0.49
TCGA-DU-5854-01A	0.49	0.28	0.49	0.11
TCGA-S9-A7J2-01A	0.49	0.59	-0.2	0.49
TCGA-E1-5311-01A	0.5	0.68	-0.14	0.5
TCGA-DU-6396-01A	0.5	0.25	0.5	-1.25
TCGA-S9-A7QW-01A	0.51	0.67	-0.51	0.51
TCGA-IK-7675-01A	0.52	0.26	-1.13	0.52
TCGA-DU-7300-01A	0.53	0.67	0.53	-0.17
TCGA-S9-A6WN-01A	0.54	0.48	0.54	-0.29
TCGA-HT-7468-01A	0.54	0.63	-1.25	0.54
TCGA-CS-4941-01A	0.55	0.53	0.55	-0.67
TCGA-DU-8168-01A	0.55	0.65	-0.67	0.55
TCGA-DU-6392-01A	0.55	0.35	0.55	0.78
TCGA-CS-4943-01A	0.55	0.42	-1.08	0.55
TCGA-TM-A84G-01A	0.56	0.56	-0.59	0.56
TCGA-HT-8563-01A	0.57	0.31	0.57	-1.15
TCGA-DU-8161-01A	0.58	0.59	0.58	-0.77
TCGA-DU-5874-01A	0.58	0.46	-0.43	0.58
TCGA-DU-6394-01A	0.59	0.5	-0.58	0.59
TCGA-E1-5318-01A	0.59	0.4	-0.66	0.59
TCGA-FG-A6J3-01A	0.59	0.38	0.59	0.46
TCGA-FG-7634-01A	0.6	0.43	-0.26	0.6
TCGA-RY-A840-01A	0.61	0.65	-0.45	0.61
TCGA-TM-A84I-01A	0.61	0.27	-1.15	0.61
TCGA-TQ-A7RP-01A	0.61	0.71	0.61	-0.28
TCGA-DU-8158-01A	0.62	0.46	0.62	-0.19
TCGA-DU-7012-01A	0.62	0.45	0.62	-0.36
TCGA-CS-5396-01A	0.63	0.52	-0.38	0.63
TCGA-S9-A6WP-01A	0.63	0.4	0.63	-0.77
TCGA-HT-A617-01A	0.63	0.62	0.63	-0.32
TCGA-HT-7601-01A	0.63	0.54	0.63	-1.16
TCGA-HT-8110-01A	0.64	0.54	0.64	-1.3
TCGA-P5-A730-01A	0.64	0.63	-0.76	0.64
TCGA-HT-A618-01A	0.65	0.48	0.65	-1.85
TCGA-HT-7604-01A	0.65	0.73	-1.25	0.65
TCGA-VW-A7QS-01A	0.65	0.7	-0.53	0.65
TCGA-P5-A5F4-01A	0.67	0.73	0.67	0.13
TCGA-HT-7882-01A	0.68	0.15	0.68	0.45
TCGA-DU-A76K-01A	0.68	0.57	0.74	0.68
TCGA-DU-6393-01A	0.68	0.59	-0.59	0.68
TCGA-DB-5277-01A	0.69	0.31	-0.95	0.69
TCGA-HT-7483-01A	0.7	0.54	-0.41	0.7
TCGA-DU-6410-01A	0.72	0.41	-1.03	0.72
TCGA-P5-A731-01A	0.72	0.52	0.89	0.72
TCGA-S9-A6U0-01A	0.72	0.19	0.72	0.57
TCGA-FG-7643-01A	0.73	0.72	0.73	-0.15
TCGA-DB-5281-01A	0.74	0.49	0.31	0.74
TCGA-HT-7681-01A	0.75	0.82	0.75	-0.11
TCGA-FG-7637-01A	0.75	0.6	-0.96	0.75
TCGA-CS-6666-01A	0.76	0.24	-0.74	0.76
TCGA-TM-A84M-01A	0.77	0.52	-0.65	0.77
TCGA-S9-A6U5-01A	0.77	0.53	0.77	-0.73
TCGA-P5-A72Z-01A	0.77	0.3	-0.41	0.77
TCGA-CS-5395-01A	0.78	0.57	-0.52	0.78
TCGA-DH-A66G-01A	0.78	0.54	0.78	-0.29
TCGA-S9-A6WL-01A	0.79	0.39	0.42	0.79
TCGA-S9-A6UA-01A	0.8	0.33	0.8	0.88
TCGA-CS-5397-01A	0.82	0.55	0.28	0.82
TCGA-DU-7292-01A	0.82	0.61	0.57	0.82
TCGA-QH-A65X-01A	0.83	0.52	0.7	0.83
TCGA-HT-7478-01A	0.84	0.43	0.84	-1.46
TCGA-HT-7469-01A	0.86	0.53	-1.2	0.86
TCGA-DU-A7T8-01A	0.89	0.42	0.89	0.26
TCGA-DB-A4XG-01A	0.95	0.69	-0.87	0.95
TCGA-S9-A7IY-01A	0.96	0.53	0.96	-1.47
TCGA-HT-A4DV-01A	0.97	0.79	0.97	-0.68
TCGA-HT-8564-01A	0.97	0.56	0.97	0.14
TCGA-TM-A7C3-01A	0.98	0.25	-0.55	0.98
TCGA-HT-7476-01A	0.99	0.37	0.99	0.16
TCGA-DU-7018-01A	1.01	0.55	-0.79	1.01
TCGA-TM-A84C-01A	1.05	0.33	-0.05	1.05
TCGA-HT-A5RC-01A	1.05	0.35	-0.35	1.05
TCGA-DU-6405-01A	1.07	0.53	-0.37	1.07
TCGA-DU-7010-01A	1.07	0.34	-1.14	1.07
TCGA-DB-A4XA-01A	1.08	0.44	1.08	-0.72
TCGA-S9-A7J0-01A	1.1	0.24	-1.14	1.1
TCGA-FG-A4MW-01A	1.12	0.41	0.45	1.12
TCGA-FG-A4MU-01B	1.14	0.29	-0.09	1.14
TCGA-VM-A8CA-01A	1.15	0.57	1.15	-0.42
TCGA-DB-A64W-01A	1.16	0.78	-0.7	1.16
TCGA-S9-A6WG-01A	1.17	0.26	1.17	0.38
TCGA-DB-A64V-01A	1.17	0.58	1.17	-1.64
TCGA-HT-7606-01A	1.18	0.48	-1.44	1.18
TCGA-CS-6188-01A	1.22	0.39	-0.31	1.22
TCGA-FG-A70Z-01A	1.22	0.47	1.22	0.87
TCGA-S9-A7IX-01A	1.23	0.39	1.23	0.23
TCGA-DU-6406-01A	1.24	0.25	-0.2	1.24
TCGA-E1-5304-01A	1.27	0.3	-1.53	1.27
TCGA-E1-A7YV-01A	1.33	0.45	-0.76	1.33
TCGA-S9-A7IS-01A	1.36	0.34	-0.8	1.36
TCGA-HT-8104-01A	1.36	0.62	-0.35	1.36
TCGA-HT-7477-01B	1.36	0.39	-0.78	1.36
TCGA-VM-A8C9-01A	1.38	0.54	1.38	0.01
TCGA-E1-A7YN-01A	1.41	0.56	1.41	-2.08
TCGA-DU-A7T6-01A	1.42	0.43	-0.1	1.42
TCGA-E1-A7YI-01A	1.49	0.33	-0.9	1.49
TCGA-FG-A87N-01A	1.59	0.55	-0.64	1.59
TCGA-TM-A84J-01A	1.62	0.32	-0.92	1.62
TCGA-HT-8018-01A	1.63	0.6	1.63	-0.32
TCGA-TQ-A7RM-01A	1.63	0.42	-1.4	1.63
TCGA-HT-8011-01A	1.67	0.47	-1.03	1.67
TCGA-P5-A736-01A	1.7	0.29	1.7	-1.57
TCGA-TM-A84F-01A	1.84	0.57	1.84	-2.35
TCGA-DU-A5TR-01A	1.86	0.14	1.86	-1.96
CGGA_1002	-0.28	0.72	0.98	-0.28
CGGA_1003	0.15	0.44	-0.37	0.15
CGGA_1010	0.77	0.07	0.77	-1.23
CGGA_1012	0.9	0.39	-0.09	0.9
CGGA_1014	0.14	0.51	1.03	0.14
CGGA_1018	0.26	0.65	-0.72	0.26
CGGA_103	0	0.43	-0.58	0
CGGA_1030	-0.22	0.86	0.12	-0.22
CGGA_1032	1.94	0.06	1.94	-1.54
CGGA_1033	-0.19	0.95	1.01	-0.19
CGGA_1037	-0.38	0.86	1.37	-0.38
CGGA_1048	-0.32	0.36	0.61	-0.32
CGGA_1051	-0.25	0.62	0.63	-0.25
CGGA_1055	-0.19	0.47	-1.2	-0.19
CGGA_1057	1.3	0.55	1.3	-1.17
CGGA_1058	-0.63	0.58	-0.9	-0.63
CGGA_106	1.83	0.77	1.83	-1.66
CGGA_1065	0.75	0.66	-0.57	0.75
CGGA_1066	-0.09	0.55	0.09	-0.09
CGGA_107	1.89	0.23	-0.89	1.89
CGGA_108	0.93	0.17	-0.13	0.93
CGGA_1087	0.55	0.63	-1.05	0.55
CGGA_1097	0.64	0.59	0.32	0.64
CGGA_1100	-1.05	0.09	1.09	-1.05
CGGA_1101	-0.84	0.05	1.33	-0.84
CGGA_1108	-0.36	0.13	0.09	-0.36
CGGA_1111	0.36	0.41	0.36	0.71
CGGA_112	0.03	0.47	-0.23	0.03
CGGA_1120	1.32	0.1	1.32	-1.15
CGGA_1121	0.36	0.81	-0.18	0.36
CGGA_1126	0.17	0.55	0.42	0.17
CGGA_1127	-0.61	0.81	1.17	-0.61
CGGA_1131	0.74	0.41	-1.43	0.74
CGGA_1132	-0.73	0.62	1.19	-0.73
CGGA_1137	1.4	0.05	1.4	-1.24
CGGA_1141	-0.31	0.87	1.35	-0.31
CGGA_1144	-0.43	0.76	0.63	-0.43
CGGA_1147	-0.07	0.65	-0.48	-0.07
CGGA_1148	-0.24	0.45	-0.28	-0.24
CGGA_1152	1.48	0.52	1.48	0.17
CGGA_1154	-0.68	0.29	-0.64	-0.68
CGGA_1155	-0.23	0.71	0.98	-0.23
CGGA_1156	-0.13	0.44	1.12	-0.13
CGGA_1157	0.22	0.65	0.98	0.22
CGGA_1158	0.07	0.34	-0.44	0.07
CGGA_1159	-0.49	0.82	1.45	-0.49
CGGA_1161	-0.11	0.89	1.15	-0.11
CGGA_1162	-0.69	0.81	1.5	-0.69
CGGA_1169	-0.95	0.5	0.32	-0.95
CGGA_1178	-0.18	0.65	-0.03	-0.18
CGGA_1181	0.21	0.73	0.36	0.21
CGGA_1183	0.4	0.47	-0.35	0.4
CGGA_1184	-0.22	0.88	1.32	-0.22
CGGA_1185	0.99	0.13	-0.41	0.99
CGGA_1191	0.93	0.33	-0.14	0.93
CGGA_1192	1.29	0.3	1.29	-1.03
CGGA_1195	0.18	0.79	0.68	0.18
CGGA_1198	1.32	0.11	1.32	-1.5
CGGA_1204	0.6	0.59	-1.15	0.6
CGGA_1205	1.71	0.02	1.71	-1.15
CGGA_1207	-0.27	0.84	0.96	-0.27
CGGA_1211	-0.52	0.6	-0.05	-0.52
CGGA_1212	-0.53	0.62	-1.04	-0.53
CGGA_1223	1.18	0.23	0.34	1.18
CGGA_1226	-0.61	0.48	0.55	-0.61
CGGA_1228	-0.5	0.51	1.02	-0.5
CGGA_1232	-0.52	0.2	1.2	-0.52
CGGA_1235	-0.91	0.41	1.3	-0.91
CGGA_1238	0.34	0.21	0.91	0.34
CGGA_1239	0.18	0.51	-0.04	0.18
CGGA_1264	-0.47	0.41	0.27	-0.47
CGGA_1269	0.18	0.45	-0.04	0.18
CGGA_1273	0.02	0.48	0.51	0.02
CGGA_1286	-0.1	0.85	0.48	-0.1
CGGA_1291	-0.39	0.81	1.18	-0.39
CGGA_1295	0.61	0.3	0.61	-1.09
CGGA_1300	-0.84	0.44	-0.45	-0.84
CGGA_1303	-1.24	0.18	1.33	-1.24
CGGA_1305	-0.55	0.76	0.83	-0.55
CGGA_1309	0.55	0.91	0.55	0.06
CGGA_1311	0.33	0.61	-1.29	0.33
CGGA_1317	-1.24	0.1	1.45	-1.24
CGGA_1318	-1.05	0.15	0.66	-1.05
CGGA_1319	-0.19	0.83	0.67	-0.19
CGGA_1321	0.8	0.25	-0.8	0.8
CGGA_1334	-0.38	0.39	1.26	-0.38
CGGA_1335	0.19	0.88	0.57	0.19
CGGA_1339	-0.16	0.63	-0.87	-0.16
CGGA_1345	1.12	0.84	1.12	-1.21
CGGA_135	0.51	0.17	0.51	0.43
CGGA_1350	1.18	0.14	1.18	-1.31
CGGA_1356	-0.36	0.86	0.68	-0.36
CGGA_1359	1.06	0.34	0.18	1.06
CGGA_1361	-0.4	0.68	-0.04	-0.4
CGGA_1362	-1.38	0.51	0.45	-1.38
CGGA_1368	0.95	0.16	0.95	-1.2
CGGA_1369	-0.15	0.89	0.5	-0.15
CGGA_1377	-0.33	0.39	-0.94	-0.33
CGGA_1383	0.55	0.84	0.13	0.55
CGGA_1386	0.91	0.88	0.91	-0.27
CGGA_1389	0.07	0.89	0.7	0.07
CGGA_1390	-0.2	0.72	1.06	-0.2
CGGA_1398	0.65	0.25	-0.42	0.65
CGGA_1400	0	0.84	0.7	0
CGGA_1401	-0.68	0.46	-0.6	-0.68
CGGA_1404	0.3	0.89	0.54	0.3
CGGA_1407	-0.21	0.81	1.03	-0.21
CGGA_1413	-0.34	0.67	-0.44	-0.34
CGGA_1416	-0.02	0.87	0.28	-0.02
CGGA_1417	0.02	0.61	-0.99	0.02
CGGA_1421	1.09	0.94	1.09	-0.6
CGGA_1424	1.2	0.16	1.2	-1.43
CGGA_1427	-0.66	0.74	1	-0.66
CGGA_1431	-0.33	0.79	0.93	-0.33
CGGA_1434	1.3	0.36	1.3	-0.09
CGGA_1435	0.11	0.54	0.29	0.11
CGGA_1437	-0.39	0.89	0.97	-0.39
CGGA_1440	-0.11	0.71	0.63	-0.11
CGGA_1443	1.25	0.56	1.25	-1.42
CGGA_1445	0.51	0.06	0.51	-0.22
CGGA_1446	0.74	0.21	0.74	-1.52
CGGA_1447	0.98	0.25	0.98	-1.57
CGGA_1454	-0.18	0.94	0.76	-0.18
CGGA_1455	0.83	0.22	0.83	-1.5
CGGA_1458	0.81	0.35	-0.47	0.81
CGGA_1459	1.47	0.43	-0.5	1.47
CGGA_1463	0.05	0.68	-0.89	0.05
CGGA_1469	0.95	0.23	0.95	-1.34
CGGA_1471	-0.65	0.56	0.43	-0.65
CGGA_1473	-1.13	0.03	1.82	-1.13
CGGA_1474	1.24	0.22	1.24	-1.7
CGGA_1477	-0.65	0.85	0.55	-0.65
CGGA_1482	0.74	0.91	0.74	-0.47
CGGA_1487	1.46	0.65	0.31	1.46
CGGA_1488	-0.58	0.62	-0.44	-0.58
CGGA_1497	0.89	0.37	-1.6	0.89
CGGA_1502	-0.06	0.79	1.45	-0.06
CGGA_1504	-0.45	0.69	1.27	-0.45
CGGA_1508	-0.73	0.75	1.65	-0.73
CGGA_1510	1.04	0.37	-0.64	1.04
CGGA_1513	0.31	0.86	0.34	0.31
CGGA_1514	1.54	0.04	1.54	-0.84
CGGA_1516	0.09	0.72	0.18	0.09
CGGA_1517	0.28	0.79	0.28	0.28
CGGA_1518	0.8	0.06	0.4	0.8
CGGA_1523	-0.52	0.46	0.2	-0.52
CGGA_1524	0.64	0.77	0.22	0.64
CGGA_1525	-0.69	0.71	1.53	-0.69
CGGA_1526	-0.7	0.7	-0.88	-0.7
CGGA_1527	-0.6	0.63	0.66	-0.6
CGGA_1528	-0.37	0.8	0.81	-0.37
CGGA_1530	-0.65	0.34	1.23	-0.65
CGGA_1533	1.55	0.47	1.55	-0.25
CGGA_1536	-1.65	0.44	-0.36	-1.65
CGGA_1544	0.51	0.76	-0.36	0.51
CGGA_1552	0.14	0.78	0.27	0.14
CGGA_1553	-0.36	0.77	0.35	-0.36
CGGA_1554	1.04	0.38	0.38	1.04
CGGA_1557	0.4	0.83	0.49	0.4
CGGA_1562	0.25	0.86	0.44	0.25
CGGA_1563	0.49	0.61	0.49	0.61
CGGA_1565	-0.44	0.81	0.48	-0.44
CGGA_1566	0.69	0.88	-0.14	0.69
CGGA_1567	1.55	0.81	1.55	-0.77
CGGA_1568	-0.38	0.79	1.25	-0.38
CGGA_1569	-0.06	0.87	0.65	-0.06
CGGA_157	-0.35	0.75	1.11	-0.35
CGGA_1575	-0.24	0.53	-0.24	0.46
CGGA_1579	-0.34	0.93	1.78	-0.34
CGGA_1580	-0.77	0.39	-0.35	-0.77
CGGA_1583	-0.39	0.81	1.17	-0.39
CGGA_1587	-0.18	0.45	-0.18	0.49
CGGA_1588	1.93	0.49	1.93	-1.22
CGGA_1589	-0.48	0.81	0.3	-0.48
CGGA_1591	-0.38	0.64	-0.43	-0.38
CGGA_1592	0.01	0.65	-0.86	0.01
CGGA_1594	-0.68	0.52	1.59	-0.68
CGGA_1598	0.32	0.46	-0.03	0.32
CGGA_1606	1.43	0.45	-1.68	1.43
CGGA_1607	0.78	0.61	0.16	0.78
CGGA_1608	1.73	0.7	1.73	-1.42
CGGA_1610	1.74	0.5	1.74	-0.37
CGGA_1614	-0.54	0.8	1.04	-0.54
CGGA_1617	0.06	0.9	1.18	0.06
CGGA_1618	0.23	0.85	0.59	0.23
CGGA_1619	0.51	0.48	0.37	0.51
CGGA_1620	-0.45	0.83	1.34	-0.45
CGGA_1621	0.13	0.76	0.31	0.13
CGGA_1623	0.26	0.62	1.67	0.26
CGGA_1627	-0.65	0.7	1.2	-0.65
CGGA_1630	1.43	0.88	1.43	-0.37
CGGA_1640	-0.44	0.77	1.71	-0.44
CGGA_1642	-0.23	0.83	1.4	-0.23
CGGA_1645	-0.62	0.5	-0.94	-0.62
CGGA_1647	-0.53	0.79	1.32	-0.53
CGGA_1648	1.21	0.92	1.21	-0.58
CGGA_1649	1.31	0.73	1.31	-0.31
CGGA_165	-0.29	0.88	1.25	-0.29
CGGA_1651	-0.2	0.9	0.94	-0.2
CGGA_1653	-0.28	0.76	1.34	-0.28
CGGA_1655	-0.48	0.83	1.03	-0.48
CGGA_1657	-0.23	0.82	1.48	-0.23
CGGA_1661	-0.11	0.86	0.96	-0.11
CGGA_1662	-0.15	0.85	1	-0.15
CGGA_1664	-0.08	0.9	1	-0.08
CGGA_1667	-0.99	0.68	-0.72	-0.99
CGGA_1669	1.09	0.24	-0.02	1.09
CGGA_1670	1.28	0.24	-0.04	1.28
CGGA_1671	0.67	0.59	-0.59	0.67
CGGA_1673	0.04	0.66	0.53	0.04
CGGA_1675	0.02	0.49	0.02	-0.45
CGGA_1679	1.23	0.95	1.23	-0.18
CGGA_1680	1.28	0.26	1.28	-1.96
CGGA_1685	0.62	0.37	-1.26	0.62
CGGA_1686	0.52	0.68	0.54	0.52
CGGA_1688	0.91	0.29	1.11	0.91
CGGA_1689	-0.34	0.71	0.38	-0.34
CGGA_1693	0.09	0.55	0.67	0.09
CGGA_1695	0.5	0.87	0.33	0.5
CGGA_1696	1.2	0.16	1.2	-1.47
CGGA_1700	1.63	0.75	1.63	-0.4
CGGA_1701	0.22	0.88	0.62	0.22
CGGA_1703	-0.23	0.84	0.96	-0.23
CGGA_1704	-0.34	0.81	1.1	-0.34
CGGA_1714	1.31	0.83	1.31	-0.64
CGGA_1715	0.76	0.32	0.73	0.76
CGGA_1716	0.01	0.37	0.01	-0.53
CGGA_1718	0.06	0.72	0.63	0.06
CGGA_1720	0.37	0.48	-1.57	0.37
CGGA_1721	-0.02	0.81	1.13	-0.02
CGGA_1723	0.24	0.79	0.57	0.24
CGGA_1725	1	0.5	-0.29	1
CGGA_1731	-0.08	0.63	0.44	-0.08
CGGA_1737	0.38	0.87	0.42	0.38
CGGA_1738	0.37	0.55	0.66	0.37
CGGA_1739	0.3	0.76	0.75	0.3
CGGA_1743	-0.21	0.87	0.81	-0.21
CGGA_1745	0.96	0.27	0.96	-1.52
CGGA_1747	-0.99	0.71	1.22	-0.99
CGGA_1760	1.2	0.74	1.2	-0.19
CGGA_1771	0.02	0.6	0.63	0.02
CGGA_1786	0.48	0.9	-0.31	0.48
CGGA_1791	1.29	0.12	1.29	-1.54
CGGA_1809	0.22	0.55	-0.65	0.22
CGGA_1829	-0.43	0.85	1.05	-0.43
CGGA_1850	-0.4	0.78	0.27	-0.4
CGGA_1854	-0.44	0.64	0.06	-0.44
CGGA_1862	1.44	0.65	-1.29	1.44
CGGA_1863	0.87	0.88	0.25	0.87
CGGA_1875	0.09	0.65	1.1	0.09
CGGA_1880	0.42	0.83	0.16	0.42
CGGA_1882	-0.05	0.85	0.61	-0.05
CGGA_1902	0.89	0.72	0.36	0.89
CGGA_1903	-0.59	0.65	1.1	-0.59
CGGA_1906	1.15	0.77	1.15	-0.36
CGGA_194	-0.14	0.81	0.56	-0.14
CGGA_1994	0.18	0.91	0.75	0.18
CGGA_2002	-0.15	0.76	0.18	-0.15
CGGA_2006	0.17	0.22	0.17	1.07
CGGA_2013	0.32	0.77	0.53	0.32
CGGA_2046	0.48	0.68	0.48	0.11
CGGA_2079	1.04	0.56	-1.29	1.04
CGGA_2081	0.35	0.76	0.39	0.35
CGGA_2121	1.56	0.25	1.56	0.51
CGGA_2129	1.6	0.49	-0.67	1.6
CGGA_265	0.32	0.66	0.84	0.32
CGGA_279	0.86	0.72	-0.23	0.86
CGGA_28	-0.83	0.66	0.79	-0.83
CGGA_288	0.88	0.67	0.88	0.09
CGGA_290	-0.1	0.49	-0.71	-0.1
CGGA_320	-0.36	0.76	0.23	-0.36
CGGA_336	0.44	0.62	-0.68	0.44
CGGA_358	1.11	0.91	1.11	-0.61
CGGA_369	-0.45	0.91	1.03	-0.45
CGGA_406	2.05	0.38	-1.66	2.05
CGGA_42	-0.75	0.63	-0.31	-0.75
CGGA_420	0.64	0.54	-0.98	0.64
CGGA_457	1.52	0.22	-1.53	1.52
CGGA_474	1.05	0.38	-0.2	1.05
CGGA_482	-0.73	0.55	-0.66	-0.73
CGGA_492	0.63	0.23	0.63	-0.26
CGGA_503	-0.9	0.61	1.09	-0.9
CGGA_507	-0.2	0.76	0.92	-0.2
CGGA_521	-0.21	0.24	0.16	-0.21
CGGA_554	1.02	0.88	1.02	0.11
CGGA_583	1.01	0.13	1.01	-1.64
CGGA_619	-0.01	0.68	0.26	-0.01
CGGA_625	0.02	0.86	0.29	0.02
CGGA_634	-0.22	0.8	0.32	-0.22
CGGA_652	-0.18	0.86	0.48	-0.18
CGGA_663	-0.48	0.73	0.14	-0.48
CGGA_703	1.23	0.36	1.23	0.83
CGGA_705	0.26	0.37	0.08	0.26
CGGA_707	-0.34	0.65	0.32	-0.34
CGGA_720	1.01	0.75	-0.13	1.01
CGGA_721	-1.33	0.76	0.48	-1.33
CGGA_724	-0.1	0.9	0.8	-0.1
CGGA_730	-0.81	0.74	0.14	-0.81
CGGA_763	-1.08	0.69	1.14	-1.08
CGGA_780	-0.39	0.84	1.04	-0.39
CGGA_799	0.1	0.76	0.27	0.1
CGGA_809	-0.64	0.71	0.33	-0.64
CGGA_810	1.12	0.56	1.12	-0.9
CGGA_825	-0.33	0.6	-0.26	-0.33
CGGA_846	-1.4	0.86	1.25	-1.4
CGGA_852	0.12	0.3	-0.3	0.12
CGGA_861	-1.05	0.44	1.18	-1.05
CGGA_863	-1.5	0.72	-0.25	-1.5
CGGA_867	0.54	0.28	-0.16	0.54
CGGA_881	0.93	0.14	-0.36	0.93
CGGA_882	-0.47	0.66	0.56	-0.47
CGGA_888	0.73	0.4	-1.22	0.73
CGGA_889	0.09	0.88	-0.03	0.09
CGGA_890	-0.11	0.31	0.2	-0.11
CGGA_901	-0.35	0.34	0.2	-0.35
CGGA_903	-0.37	0.28	-1.11	-0.37
CGGA_D19	0.76	0.43	-1.28	0.76
CGGA_D28	0.08	0.74	-1.16	0.08
CGGA_D50	0.79	0.3	-0.69	0.79
CGGA_J50	-0.45	0.34	0.68	-0.45
CGGA_J73	0.25	0.4	0.42	0.25
CGGA_P103	0.05	0.65	-0.34	0.05
CGGA_P104	0.98	0.07	0.98	-1.46
CGGA_P108	0.01	0.2	-0.54	0.01
CGGA_P110	0.88	0.06	-0.95	0.88
CGGA_P111	-0.08	0.59	-0.85	-0.08
CGGA_P113	-0.52	0.81	0.5	-0.52
CGGA_P115	1.46	0.06	1.46	-1.37
CGGA_P121	-0.52	0.96	1.12	-0.52
CGGA_P122	0.26	0.56	-0.93	0.26
CGGA_P128	-0.69	0.69	0.36	-0.69
CGGA_P13	0.26	0.68	-0.33	0.26
CGGA_P131	-0.18	0.59	-0.47	-0.18
CGGA_P132	-0.64	0.58	-0.5	-0.64
CGGA_P137	-0.3	0.55	-0.93	-0.3
CGGA_P142	-0.78	0.72	0.03	-0.78
CGGA_P144	-0.86	0.61	0.36	-0.86
CGGA_P145	-1.08	0.8	0.97	-1.08
CGGA_P147	-0.49	0.37	-0.28	-0.49
CGGA_P151	-0.04	0.85	1.2	-0.04
CGGA_P153	1.26	0.1	1.26	-1.5
CGGA_P155	0.35	0.66	0.3	0.35
CGGA_P156	-0.12	0.72	-0.48	-0.12
CGGA_P157	0.4	0.51	-0.58	0.4
CGGA_P158	1.19	0.16	1.19	-1.43
CGGA_P159	-0.17	0.57	-0.31	-0.17
CGGA_P163	-1.9	0.5	-0.21	-1.9
CGGA_P165	1.45	0.13	1.45	-1.29
CGGA_P17	-0.88	0.56	-0.36	-0.88
CGGA_P172	1.15	0.09	1.15	-1.34
CGGA_P173	-1.37	0.48	-0.06	-1.37
CGGA_P174	-0.23	0.56	-0.21	-0.23
CGGA_P176	0	0.68	-0.51	0
CGGA_P177	-0.49	0.24	-0.32	-0.49
CGGA_P179	-0.49	0.6	0.12	-0.49
CGGA_P18	-0.26	0.65	-0.82	-0.26
CGGA_P181	-1.49	0.33	-0.3	-1.49
CGGA_P183	0.42	0.54	-1.04	0.42
CGGA_P185	0.81	0.29	-0.76	0.81
CGGA_P19	-0.99	0.52	-0.62	-0.99
CGGA_P20	-0.22	0.44	-0.54	-0.22
CGGA_P21	0.22	0.76	0.27	0.22
CGGA_P23	1.31	0.09	1.31	-1.61
CGGA_P265	1.43	0.02	1.43	-1.4
CGGA_P266	1.17	0.09	1.17	-1.13
CGGA_P269	1.16	0.76	-0.2	1.16
CGGA_P27	0.16	0.63	-0.49	0.16
CGGA_P271	1.18	0.13	1.18	-1.48
CGGA_P279	0.88	0.81	-0.05	0.88
CGGA_P286	0.88	0.72	0	0.88
CGGA_P29	1.04	0.07	1.04	-1.31
CGGA_P3	1.09	0.09	1.09	-1.44
CGGA_P30	1.81	0.1	-0.43	1.81
CGGA_P306	0.53	0.72	0.27	0.53
CGGA_P308	1.24	0.87	1.24	-0.2
CGGA_P31	1.84	0.73	1.84	-0.01
CGGA_P310	1.39	0.85	1.39	-0.58
CGGA_P311	0.6	0.57	0.6	-0.08
CGGA_P314	0.65	0.76	0.14	0.65
CGGA_P315	-0.01	0.72	0.94	-0.01
CGGA_P316	1.55	0.85	1.55	-0.69
CGGA_P319	1.92	0.17	-1.21	1.92
CGGA_P326	0.13	0.84	0.72	0.13
CGGA_P328	0.01	0.43	0.07	0.01
CGGA_P337	0.67	0.48	0.77	0.67
CGGA_P338	0.86	0.68	0.86	0.3
CGGA_P346	0.23	0.86	0.2	0.23
CGGA_P356	0.04	0.81	0.48	0.04
CGGA_P358	1.73	0.79	1.73	-0.84
CGGA_P364	-0.15	0.8	0.34	-0.15
CGGA_P388	0.24	0.52	0.24	0.01
CGGA_P392	0.79	0.72	-0.03	0.79
CGGA_P399	0.66	0.67	-0.07	0.66
CGGA_P416	0.75	0.8	-0.08	0.75
CGGA_P421	2.09	0.6	-1.21	2.09
CGGA_P422	0.4	0.71	0	0.4
CGGA_P437	-0.82	0.62	-0.82	1.28
CGGA_P438	1.23	0.5	0.33	1.23
CGGA_P439	0.4	0.75	0.11	0.4
CGGA_P446	1.15	0.67	-1.13	1.15
CGGA_P461	0.75	0.56	0.75	0.77
CGGA_P468	1.3	0.84	-1.23	1.3
CGGA_P483	0.58	0.22	-0.1	0.58
CGGA_P492	0.45	0.68	-0.03	0.45
CGGA_P5	-0.03	0.45	-0.21	-0.03
CGGA_P500	0.59	0.81	-0.86	0.59
CGGA_P501	-0.08	0.82	-0.71	-0.08
CGGA_P505	-0.2	0.81	0.15	-0.2
CGGA_P508	0.31	0.82	-0.43	0.31
CGGA_P510	0.1	0.52	0.74	0.1
CGGA_P520	-0.22	0.87	-0.78	-0.22
CGGA_P568	-0.7	0.7	-0.7	1.53
CGGA_P594	0.96	0.29	-0.12	0.96
CGGA_P604	1.19	0.37	-0.69	1.19
CGGA_P633	0.59	0.6	-0.53	0.59
CGGA_P83	-0.56	0.7	0.23	-0.56
CGGA_P84	-0.64	0.44	-0.74	-0.64
CGGA_P86	0.3	0.58	-1.02	0.3
CGGA_P93	-1.27	0.42	-0.11	-1.27
CGGA_P98	1.35	0.89	1.35	-0.53
CGGA_1006	0.88	0.33	-0.06	0.88
CGGA_1022	0.08	0.43	-0.36	0.08
CGGA_1034	-0.77	0.48	-0.49	-0.77
CGGA_1079	0.05	0.64	-0.32	0.05
CGGA_1081	1.87	0.31	-0.66	1.87
CGGA_1140	-0.69	0.94	-0.06	-0.69
CGGA_1145	0.34	0.31	-0.22	0.34
CGGA_1263	-0.82	0.33	0.35	-0.82
CGGA_1280	-0.4	0.5	-0.78	-0.4
CGGA_1281	-0.51	0.82	0.15	-0.51
CGGA_1284	-0.11	0.69	-0.46	-0.11
CGGA_1292	-0.35	0.5	-0.4	-0.35
CGGA_1340	0.08	0.19	-1.09	0.08
CGGA_1408	0.43	0.26	0.43	-0.9
CGGA_1411	1.18	0.53	1.18	-1.53
CGGA_235	0.18	0.82	-0.85	0.18
CGGA_269	0.61	0.52	0.61	-1.11
CGGA_276	-1.26	0.63	-0.32	-1.26
CGGA_323	-0.64	0.9	0.39	-0.64
CGGA_330	0.13	0.21	0.13	-0.71
CGGA_426	0.65	0.43	-0.2	0.65
CGGA_448	0.38	0.29	0.38	-0.67
CGGA_488	0.76	0.11	-0.07	0.76
CGGA_493	-0.62	0.62	-0.27	-0.62
CGGA_541	-0.81	0.84	0.81	-0.81
CGGA_564	-0.53	0.44	0.01	-0.53
CGGA_565	-0.89	0.51	0.85	-0.89
CGGA_578	0.68	0.4	-0.78	0.68
CGGA_599	-0.57	0.57	-0.52	-0.57
CGGA_616	0.45	0.29	-0.29	0.45
CGGA_630	-0.37	0.65	-0.31	-0.37
CGGA_633	-0.24	0.26	0.31	-0.24
CGGA_638	-1.83	0.4	0.71	-1.83
CGGA_643	0.52	0.32	-0.55	0.52
CGGA_659	-0.66	0.87	0.75	-0.66
CGGA_678	0.3	0.47	-0.05	0.3
CGGA_727	-0.22	0.47	-0.8	-0.22
CGGA_766	0.3	0.57	-1.14	0.3
CGGA_791	0.37	0.42	-0.73	0.37
CGGA_796	-1	0.6	-0.02	-1
CGGA_807	-0.62	0.87	0.37	-0.62
CGGA_871	-0.97	0.49	0.04	-0.97
CGGA_D11	0.16	0.48	0.08	0.16
CGGA_D16	0.39	0.14	0.39	-0.23
CGGA_D44	0.7	0.39	-0.53	0.7
CGGA_D58	-1.28	0.69	0.69	-1.28
CGGA_J030	-0.39	0.71	-0.35	-0.39
CGGA_J130	-0.99	0.79	0.7	-0.99
CGGA_1005	-0.21	0.59	-0.22	-0.21
CGGA_1013	-0.35	0.55	-0.35	-0.35
CGGA_1020	-1.42	0.35	-0.38	-1.42
CGGA_1027	-0.84	0.46	-0.84	-0.19
CGGA_1031	-0.58	0.48	-0.46	-0.58
CGGA_1046	-0.41	0.39	0.41	-0.41
CGGA_1061	-0.06	0.34	-1.58	-0.06
CGGA_1094	0.27	0.18	-0.92	0.27
CGGA_1113	1.31	0.36	-1.28	1.31
CGGA_1146	-0.49	0.61	-0.6	-0.49
CGGA_1160	0.47	0.67	-1.25	0.47
CGGA_1189	0.38	0.61	-1.1	0.38
CGGA_1190	0.3	0.52	-0.82	0.3
CGGA_1231	1.48	0.18	1.48	-2.29
CGGA_1307	0.37	0.55	-1.2	0.37
CGGA_1322	0.46	0.49	-1.55	0.46
CGGA_1329	1.14	0.58	-1.8	1.14
CGGA_1330	0.2	0.64	-1.27	0.2
CGGA_1374	-0.77	0.58	-0.77	0.06
CGGA_1388	-0.44	0.63	-0.44	-1.47
CGGA_1406	-1.03	0.34	-0.57	-1.03
CGGA_236	1.11	0.44	-1	1.11
CGGA_241	-0.5	0.7	0.86	-0.5
CGGA_245	-0.1	0.44	-0.1	-0.44
CGGA_251	-1.44	0.83	0.39	-1.44
CGGA_252	-0.05	0.51	-1.25	-0.05
CGGA_254	-0.97	0.76	-0.64	-0.97
CGGA_256	-0.19	0.41	-0.15	-0.19
CGGA_261	-0.39	0.6	0.03	-0.39
CGGA_267	0.25	0.58	-0.99	0.25
CGGA_273	-0.89	0.75	-0.41	-0.89
CGGA_283	-0.67	0.72	-0.1	-0.67
CGGA_300	-0.77	0.6	0.06	-0.77
CGGA_314	-1.21	0.53	-0.38	-1.21
CGGA_333	-1.42	0.73	0.34	-1.42
CGGA_337	-0.81	0.55	0.47	-0.81
CGGA_400	-0.93	0.33	0.17	-0.93
CGGA_431	1.04	0.52	-1.29	1.04
CGGA_446	0.09	0.64	-1.27	0.09
CGGA_458	-0.44	0.6	-0.19	-0.44
CGGA_479	-0.76	0.55	-0.37	-0.76
CGGA_485	-0.63	0.77	-1.12	-0.63
CGGA_490	-0.65	0.78	-0.38	-0.65
CGGA_501	-0.45	0.71	-1.12	-0.45
CGGA_502	-1.01	0.45	-0.11	-1.01
CGGA_510	-0.3	0.6	-0.59	-0.3
CGGA_543	-0.67	0.75	0.15	-0.67
CGGA_551	-0.5	0.71	-0.53	-0.5
CGGA_560	-0.16	0.63	-0.75	-0.16
CGGA_580	-0.5	0.64	-0.49	-0.5
CGGA_591	-0.89	0.63	-0.63	-0.89
CGGA_598	-0.07	0.68	-1.18	-0.07
CGGA_601	-0.85	0.76	0.08	-0.85
CGGA_603	-1.13	0.28	0.07	-1.13
CGGA_605	0.12	0.15	0.12	0.82
CGGA_607	-0.39	0.6	-1.28	-0.39
CGGA_632	0.46	0.32	-0.7	0.46
CGGA_635	-0.32	0.74	-1.07	-0.32
CGGA_641	-0.06	0.62	-0.44	-0.06
CGGA_642	-0.69	0.49	-0.35	-0.69
CGGA_655	-0.84	0.58	-1.09	-0.84
CGGA_662	-0.7	0.68	-1.16	-0.7
CGGA_666	-0.51	0.71	-0.19	-0.51
CGGA_671	-0.14	0.8	-0.62	-0.14
CGGA_675	-0.21	0.58	-0.6	-0.21
CGGA_685	-0.65	0.44	-0.86	-0.65
CGGA_689	0.11	0.46	-0.48	0.11
CGGA_694	-1.24	0.44	-0.02	-1.24
CGGA_698	-1.22	0.45	-0.5	-1.22
CGGA_704	-1.22	0.47	-0.75	-1.22
CGGA_715	-0.22	0.79	0.02	-0.22
CGGA_725	-0.76	0.66	-0.51	-0.76
CGGA_752	-0.89	0.62	-0.5	-0.89
CGGA_757	-0.68	0.53	-1.04	-0.68
CGGA_760	-0.69	0.62	0.27	-0.69
CGGA_762	-1.01	0.55	0.12	-1.01
CGGA_785	-1.01	0.75	-0.47	-1.01
CGGA_812	0.97	0.57	0.97	-2.27
CGGA_815	-2.09	0.45	0.11	-2.09
CGGA_818	-0.26	0.55	-0.26	-0.67
CGGA_834	1.39	0.45	-1.24	1.39
CGGA_835	-0.08	0.78	-0.97	-0.08
CGGA_838	-0.14	0.8	-0.94	-0.14
CGGA_843	-0.14	0.52	-0.76	-0.14
CGGA_856	0.12	0.59	-0.53	0.12
CGGA_858	-0.08	0.77	0.12	-0.08
CGGA_864	-0.8	0.67	-0.12	-0.8
CGGA_884	-0.08	0.48	-0.94	-0.08
CGGA_892	-0.61	0.65	-0.76	-0.61
CGGA_893	-0.72	0.67	-0.3	-0.72
CGGA_898	-0.56	0.65	-0.01	-0.56
CGGA_904	0.38	0.41	-0.83	0.38
CGGA_905	-1.31	0.44	-0.08	-1.31
CGGA_908	-0.68	0.51	-0.87	-0.68
CGGA_909	-0.67	0.7	-0.38	-0.67
CGGA_D04	-0.31	0.76	-1.07	-0.31
CGGA_D07	-0.62	0.72	0.25	-0.62
CGGA_D15	0.38	0.65	-0.73	0.38
CGGA_D20	-0.14	0.73	0.21	-0.14
CGGA_D21	-0.16	0.33	-0.16	0.28
CGGA_D24	-0.06	0.23	-0.55	-0.06
CGGA_D27	-0.04	0.61	-0.96	-0.04
CGGA_D29	-0.42	0.66	-0.27	-0.42
CGGA_D33	0.91	0.55	-0.58	0.91
CGGA_D40	-0.17	0.65	0.5	-0.17
CGGA_D45	-0.1	0.6	-0.36	-0.1
CGGA_D46	0.74	0.43	-0.59	0.74
CGGA_D47	-0.57	0.47	-0.57	0.63
CGGA_D48	-0.24	0.5	-1.07	-0.24
CGGA_D52	0.4	0.56	-0.23	0.4
CGGA_D56	1.37	0.27	-0.33	1.37
CGGA_277	-0.22	0.9	0.19	-0.22
CGGA_J023	1.57	0.44	-1.92	1.57
CGGA_J024	-0.78	0.59	-0.17	-0.78
CGGA_J042	-0.19	0.32	-0.16	-0.19
CGGA_1004	0.82	0.36	0.82	-2.35
CGGA_1071	1.15	0.68	-0.93	1.15
CGGA_1118	-0.93	0.53	-0.93	0.27
CGGA_1246	-0.26	0.76	-1.34	-0.26
CGGA_243	0.06	0.65	-1.58	0.06
CGGA_247	0.24	0.51	-0.9	0.24
CGGA_738	-2.41	0.52	0.75	-2.41
