# Supplementary material for: Ubiquitin-proteasome system-mediated ubiquitination modification patterns and characterization of tumor microenvironment infiltration, stemness and cellular senescence in low-grade glioma
Source: Aging (Albany NY). 2023 Apr 11;15(8):2970–98. doi: 10.18632/aging.204650 (PMC10188348; doi:10.18632/aging.204650)
Supplement: Supplementary Table 7 [file aging-15-204650-s007.xlsx]

## Sheet: Sheet1
Supplementary Table 7. Gene list of 119 ubiquitination modification regulators.
gene
USP1
USP2
USP3
USP4
USP5
USP6
USP7
USP8
USP9X
USP10
USP11
USP12
USP13
USP14
USP15
USP16
USP18
USP19
USP20
USP21
USP22
USP24
USP25
USP28
USP30
USP31
USP32
USP33
USP34
USP35
USP36
USP37
USP38
USP39
USP40
USP41
USP42
USP43
USP44
USP45
USP46
USP47
USP48
USP49
USP51
USP53
USP54
OTUD3
UBA1
ATG7
UBA5
UBA6
UBA7
UBE2A
UBE2B
UBE2C
UBE2D1
UBE2D2
UBE2D3
UBE2D4
UBE2E1
UBE2E2
UBE2E3
UBE2F
UBE2G1
UBE2G2
UBE2H
UBE2I
UBE2J1
UBE2J2
UBE2K
UBE2L3
UBE2L4
UBE2L6
UBE2M
UBE2MP1
UBE2N
UBE2O
UBE2Q1
UBE2Q2
UBE2R2
UBE2S
UBE2SP1
UBE2T
UBE2V1
UBE2V2
UEVLD
UBE2W
UBE2Z
NEDD4
ITCH
SMURF1
SMURF2
HERC1
HERC2
HERC3
HERC4
FBXW8
APC
ANKIB1
CBL
KBTBD7
LZTR1
TRAF6
TRIM11
TRIM21
TRIM9
BMI1
HUWE1
RNF19A
RNF144A
RNF41
TRIM8
BIRC2
BIRC3
MDM2
RNF138
RNF168
TRAF2
